15

## 16 **Abstract**

17

18 *Leptospira* genus contains species that affect human health with varying degrees of  
19 pathogenicity. In this context, we aimed to evaluate the differences in modulation of host  
20 gene expression by strains of *Leptospira* with varied virulence degrees. Our data showed  
21 a high number of differentially expressed transcripts in murine macrophages following 6h  
22 of infection with both virulent and culture-attenuated *L. interrogans* and to a lesser  
23 degree, with the saprophyte strain *L. biflexa*. That suggests that certain genes are  
24 modulated by *Leptospira* infection independent of their degree of virulence, whether  
25 others are virulence and species associated. Pathway analysis indicated that Apoptosis,  
26 ATM Signaling and Cell Cycle: G2/M DNA Damage Checkpoint Regulation were  
27 exclusively regulated following infection with the virulent strain. Results demonstrated  
28 that species and virulence play a role during host response to *Leptospira* spp in murine  
29 macrophages.

30 **Keywords:** Leptospirosis; macrophages; immune response; microarray

## 31 **Author summary**

32 Leptospirosis is an infectious disease that is transmitted from animals to humans. It is a  
33 re-emerging neglected zoonosis that is found in a range of environments worldwide, most  
34 notably tropical regions prone to flooding. This bacteria is found in soil and water and are  
35 eliminated in the urine by rats, their natural host reservoir. Through skin contacts with the  
36 bacteria people or animals can get infected however the infection process is still poorly  
37 understood, such as the fact that different strains can cause different severity of illness. In  
38 this study, we aimed to evaluate the differences in modulation of host gene expression by  
39 strains of *Leptospira* varying in virulence. After transcriptomic analysis, the results

40 showed a high number of differentially expressed genes after 6h of infection by virulent  
41 and attenuated *L. interrogans*, and to a lesser extent with *L. biflexa* saprophytic lineage.  
42 This suggests that RNAs are modulated after infection by *Leptospira* in macrophages, in  
43 a species and virulence related manner. It is hoped that the data produced will contribute  
44 to further our understanding on the pathogenesis of leptospirosis.

45

46

47

48

49

50

51

52

53

## 54 **Introduction**

55           Leptospirosis is a zoonotic bacterial disease that occurs in different  
56 epidemiological conditions [1]. The genus *Leptospira* encompasses pathogenic and  
57 saprophytic species that differ in their ability to survive and colonize different  
58 environments and hosts [2]. *Leptospira* species are classified into three groups according  
59 to their pathogenic potential: virulent pathogenic, intermediate, and saprophytes [3].  
60 Leptospirosis occurs mainly in vulnerable populations, including urban and rural dwellers  
61 [4] of tropical and subtropical developing countries [5-7]. It is a major public health  
62 problem, with a recent estimate of 1 million cases per year, and a mortality rate of 5 to  
63 10% [4,8-9].

64           Leptospire are capable of infecting humans and many domestic and wild animals,  
65 survive and thrive in host tissues, escaping from the host's natural defense mechanisms.  
66 Transmission is based on direct or indirect contact with the urine of carriers (mainly  
67 rodents); the disease varied from sub-clinical to most serious cases, progressing to renal  
68 failure and pulmonary hemorrhage [10-1].

69           Host-specific immune response against pathogenic leptospire are poorly  
70 understood, particularly regarding susceptibility resistance to infection. For decades,  
71 adaptive humoral immunity was considered as the sole player in leptospirosis, but in  
72 recent years some progress has been achieved in the fields of innate and adaptive  
73 immunity [11-14].

74           Murray and coworkers [15] identified a number of virulence factors, including the  
75 presence of lipopolysaccharides (LPS), heme oxygenase [16], Loa22 lipoprotein [17] and  
76 other proteins related to macrophage interaction with *Leptospira*.

77           Phagocytosis is one of the main mechanisms to eliminate invading microbial  
78 pathogens at the early stages of infection in individuals without acquired immunity

79 against the infecting agent, but pathogenic *Leptospira* can escape from complement  
80 attack and phagocytosis after infection [18-20]. Pathogenic *Leptospira* is also able to  
81 survive and replicate in human macrophages, but it is killed in murine macrophages [21].  
82 LPSs of pathogenic *Leptospira* activate human macrophages only through the Toll-like  
83 receptor 2 (TLR2) while murine macrophages are activated through TLR2 and TLR4 [13-  
84 22]. Vernon Pauillac and Merian [23] have shown that mononuclear macrophages of  
85 peripheral blood of hamster infected with a virulent variant of *Leptospira interrogans*  
86 secrete proinflammatory cytokines (TNF- $\alpha$ ) with a Th1 (IL-12) profile in the first hour,  
87 predominating until the fourth day after infection, whereas a Th2 profile appears after 24  
88 hours of infection. In the early course of infection, leptospires have to survive and spread  
89 in the bloodstream before causing damage to target organs [25].

90 In this study, we applied microarray technology to comparatively analyze early  
91 change in murine macrophages genes expression in response to *Leptospira* spp. with  
92 varied virulence, and to identify signaling pathways that play a role in an *in vitro* model  
93 of macrophageal infection.

94

95

96

97

98

99

100

101

102

## 103 **Results**

### 104 **Data deposition**

105 Microarray raw data files are available in Gene Expression Omnibus (GEO) and  
106 are accessible through GEO series number GSE105141 [26].

### 107 **Gene expression profile via microarray analysis**

108 Our data analysis found 892 genes in cells infected with saprophyte, attenuated  
109 and virulent leptospirosis compared to control. According to Fig 1, pathogenic leptospire  
110 modulates 892 genes (422 up and 470 down-regulated), attenuated leptospire modulates  
111 848 genes (400 upregulated and 448 downregulated) and saprophyte 299 genes (128  
112 upregulated and 171 downregulated) in a filter criterion of fold change  $\pm 2$  and false  
113 discovery rate (FDR) $<0.05$  (Fig. 1). Through treatment comparison by Venn diagram, we  
114 identify common and specific genes (Fig. 2). A total of 274 genes were common to all  
115 infected cells, despite of strains, when compared to control. Virulent and culture-  
116 attenuated infected groups groups shared 512 genes in common, while eight genes were  
117 shared between virulent and saprophyte groups and only one gene between attenuated  
118 and saprophyte infected cells (S1. Table). Average signals ( $\log_2$ ) of samples were  
119 hierarchically clustered using Pearson correlation and complete-linkage and it was  
120 observed again a clustering of samples based on species and virulence, with the virulent  
121 and culture-attenuated strains clustering closer together, followed by the saprophyte strain  
122 (Fig. 3).

123

124 **Figure 1. Differentially expressed genes after 6 hours of infection in murine**  
125 **macrophages J774A.1 with saprophytic, culture-attenuated and virulent strains of**

126 ***Leptospira* spp.** The colored bars show the up-regulated (red) or down-regulated (green)  
127 genes and grey a total of genes. (n = 3 / assay, FDR-adjusted  $p < 0.05$ , fold change  $\pm 2$ ).

128

129 **Figure 2. Venn diagram for differentially expressed genes of modulated**  
130 **macrophages at 6 hours of infection with different strains of *Leptospira* spp.** Total  
131 number of canonical pathways (n=3/treatment; FDR<0.05, fold change  $\pm 2$ ) in the  
132 contrasts Infected (Saprophyte; Attenuated and Virulent) vs. Non-infected Control.

133

134 **Figure 3. Heatmap of differentially expressed genes shows the average signal by**  
135 **macrophages at 6 hours of infection in different strains of *Leptospira* spp.** The red  
136 color indicate increased expression, green color indicates the decreased expression as  
137 compared to control (n = 3/treatment; p-value < 0.01; FDR < 0.05; linear fold change  $\pm$   
138 2).

139 In Table 1 we depict the top 9 DEGs in response to infection. These genes are  
140 present in several pathways and biological processes involved in acute inflammatory  
141 response.

142 **Table 1. Top modulated transcripts in murine macrophages following 6h of**  
143 **infection with saprophyte, culture-attenuated and virulent strains of *Leptospira* spp.**

| Regulation  | Gene Symbol | FDR-adjusted p-value | FC (Sap vs. CT) | FC (Att vs. CT) | FC (Vir vs. CT) |
|-------------|-------------|----------------------|-----------------|-----------------|-----------------|
| <b>Up</b>   | Il1b        | 0,000037             | 202,85          | 253,12          | 259,03          |
|             | Il1a        | 0,000004             | 42,58           | 120             | 127,28          |
|             | Saa3        | 0,000003             | 58,32           | 113,49          | 95,44           |
|             | Il6         | 0,000005             | 17,92           | 90,05           | 93,09           |
|             | Ccl5        | 0,000008             | 15,72           | 56,83           | 56,56           |
|             | Ptgs2       | 0,000011             | 38,21           | 52,72           | 56,33           |
|             | Nos2        | 0,000008             | 6,83            | 48,29           | 51,82           |
|             | Cxcl10      | 0,000035             | 8               | 45,54           | 51,25           |
|             | Ifit1       | 0,000217             | 6,16            | 33,6            | 37,61           |
| <b>Down</b> | Rasgrp3     | 0,000059             | -6,97           | -9,16           | -7,8            |
|             | Ighm        | 0,000045             | -4,88           | -8,22           | -7,91           |
|             | Hal         | 0,000022             | -4,52           | -6,78           | -7,01           |
|             | Cxcr4       | 0,000133             | -5,65           | -5,93           | -6,11           |
|             | Klhl24      | 0,000053             | -4,81           | -5,77           | -5,76           |
|             | Il18rap     | 0,000074             | -3,7            | -5,55           | -5,31           |
|             | Nrcam       | 0,000032             | -3,37           | -5,43           | -5,05           |
|             | Il1rl1      | 0,000028             | -3,24           | -5,35           | -4,53           |
|             | Ankrd44     | 0,000476             | -2,68           | -5,3            | -4,67           |

144 (FC=fold change; SAP= saprophyte; Att=attenuated; Vir=virulent)

145

## 146 **Analysis of signaling pathways**

147 For functional enrichment of the differentially expressed genes obtained for each  
148 treatment, the Ingenuity Pathway Analysis (IPA) software was employed, Core Analysis  
149 was performed to identify relevant biological pathways to all 3 strains using the -log BH  
150 p-value > 1.3 (equivalent to a p-value <0.01).

151



## 152 **Specific pathways modulated by the virulent strain**

153           Several pathways were identified as regulated by the virulent strain, however the  
154 Apoptosis pathway, ATM signaling and Cell Cycle: G2 / M DNA Damage Checkpoint  
155 Regulation, were exclusively expressed and affected by treatment with the virulent strain  
156 (Fig. 4). In the apoptosis pathway, the major up-regulated genes were FAS, IKBKE,  
157 NFKB1, NFKBIA, NFKBIB, NFKNID, NFKBIE, TNF, TNFRSF1B; downregulated  
158 transcripts were BCL2, CAPN2 and PARP1 (Fig. 5A). In the ATM signaling pathway,  
159 the upregulated transcript genes were CDKN1A, GADD45G, MDM2, NFKBIA and  
160 TLK2; downregulated transcripts were BRCA1, CBX5, CDK2, CHEK1, CHEK2,  
161 FANCD2, MDC1 and TOPBP1 (Fig. 5B). The upregulated genes of the Cell Cycle: G2 /  
162 M DNA Damage Checkpoint Regulation pathway were CDKN1A and MDM2;  
163 downregulated transcripts were BRCA1, CHEK1, CHEK2, PKMYT1 and WEE1 (Fig.  
164 5C).

165 **Figure 4. Venn diagram for pathways of modulated macrophages at 6 hours of**  
166 **infection with different strains of *Leptospira* spp.** Total number of canonical pathways  
167 (n=3/treatment; FDR<0.05, fold change  $\pm$  2) in the contrasts Infected (Saprophyte;  
168 Attenuated and Virulent) vs. Non-infected Control.

169

170 **Figure 5. Canonical signaling pathway obtained by the IPA (Ingenuity Pathway**  
171 **Analysis program.** Red and green indicate upregulated and down-regulated genes,  
172 respectively, compared to control group, and belongs to datasets of DEGs virulent vs.  
173 control assays. Color intensity corresponds to the degree of up or downregulation (fold-  
174 change). White represents the known genes of the pathway without identification in the  
175 transcriptomic analysis. **Panel A)** Canonical signaling pathway of Apoptosis of *in vitro*  
176 macrophages. **Panel B)** Canonical signaling of ATM of *in vitro* macrophages. **Panel C)**

177 Canonical signaling pathway of Cell Cycle: G2 / M DNA Damage Checkpoint  
178 Regulation of *in vitro* macrophages.

### 179 **Validation of microarray data by qRT-PCR**

180 Infection with  $10^7$  of virulent and attenuated (*L. interrogans* serovar Copenhageni)  
181 and saprophytic (*L. biflexa* serovar Patoc), induced significant increase of TNF- $\alpha$   
182 expression in murine macrophages (p <0.0001) compared to control. Regarding  
183 expression of IL-1 $\beta$  and NOS2, a similar expression profile was observed between  
184 Control and Saprophy, which differed from the profile found in the Attenuated and  
185 Virulent samples. The comparative analysis of the expressed values for IL-1 $\beta$  and NOS2  
186 were statistically different between the assays, compared to the attenuated and virulent  
187 strains, differing when compared to the control groups and infection with the saprophytic  
188 strain. Differently from the observed TNF expression results, there was significant  
189 difference across all assays (Fig. 6A-C).

190

191 **Figure 6. qRT-PCR of mRNA expression levels in infected macrophages with**  
192 **different strains of *Leptospira* compared to non-infected controls. Panel A)** Relative  
193 expression of TNF- $\alpha$  in saprophyte, culture-attenuated and virulent compared to control.  
194 **Panel B)** Relative expression of IL-1 $\beta$  in saprophyte, culture-attenuated and virulent  
195 compared to control. **Panel C)** Relative expression of NOS2 in saprophyte, culture-  
196 attenuated and virulent compared to control (p <0.05). Different superscript letters differs  
197 significantly (p <0.05).

## 198 Discussion

199 In this study, we took an *in vitro* approach to analyze the transcriptomic profiles of  
200 macrophages in response to saprophytic, culture-attenuated and virulent samples of  
201 *Leptospira* spp, to gain a better understanding of the disease's molecular mechanisms and  
202 pathways.

203 TREM-1 signaling was the most significant pathway modulated by all three  
204 strains. TREMs are a family of recently discovered receptors of the immunoglobulin  
205 superfamily, expressed on various cells of the myeloid lineage, which play important  
206 roles in innate immune responses, such as activating inflammatory responses and  
207 contributing to septic shock response in microbial-mediated infections [30-31]. Targeted  
208 activation of TREM-1 in our study appears to be a first line inflammatory response to the  
209 genus, regardless of virulence.

210 Other canonical pathways related to the innate immune system were a common  
211 response to all strains, the acute phase response signaling pathway, iNOS, IL-6, IL-1,  
212 TNFR1/TNFR2, MIF-regulation of innate immunity and HMGB-1 signaling. Further, all  
213 three strains are proposed to negatively regulate the antioxidant action of vitamin C  
214 pathway, suggesting that *Leptospira* spp. infection could contribute to oxidative stress  
215 associated production of reactive oxygen species (ROS). ROS-mediated intracellular  
216 oxidation is prevented by an antioxidant system, which includes low molecular weight  
217 antioxidants, such as vitamin C. This pathway is involved in cell process of survival,  
218 growth, proliferation and death [32].

219 In the culture-attenuated and virulent samples, Toll-like receptors, Interferon and  
220 inflammasome signaling pathways were significantly represented. Innate immune  
221 response is initiated by recognizing pathogens through pattern receptors as TLRs.  
222 Activation of these receptors is characterized by the massive production release of

223 proinflammatory mediators, such as cytokines, chemokines and interferons [33]. Our  
224 microarray results to virulent strain identified high gene expression for TNF- $\alpha$ , IL-1 $\beta$ , IL-  
225 6 and iNOS. Similarly of Iskandar et al [34], verified that the presence of IL-6, IL-8 and  
226 IL-1 $\beta$  in serum from human patients with leptospirosis associated with severity of  
227 disease. In fact, Schulte et al. [35] concluded that increased TNF- $\alpha$ , IL-1 $\beta$  and IL-6 can  
228 activate the coagulation system in endotoxemic models. The high concentration of IL-6 is  
229 an indicator of septic shock and correlates with the severity of leptospirosis [36].

230 In regards to signaling pathways regulated by mRNAs modulated specifically  
231 following infection with virulent *L. interrogans*, Apoptosis signaling was positively  
232 regulated by infection whereas ATM signaling and Cell Cycle: G2/M DNA Damage  
233 Checkpoint Regulation, responsible for cell cycle, DNA repair and apoptosis, were  
234 negatively modulated. Following DNA damage, cells must detect breaks and transiently  
235 block the cell cycle progression allowing time for repair [37]. Jin *et al* 35 concluded that  
236 the pathogenic *Leptospira* caused apoptosis between 3-6 hours after infection.  
237 Our data corroborates their finding that virulent *Leptospira* could modulated apoptosis,  
238 with just 6 hours of infection, through inhibition of pathways responsible for DNA repair  
239 and cell cycle control, as well as by inhibition the BCL-2 (anti-apoptotic gene) in turn  
240 leading to DNA damage and degradation. In fact, a previous study from our group has  
241 shown that BCL2 is a potentially down-regulated by mmu-mir-7667-3p following  
242 infection with *L. interrogans*, suggesting that cell survival could be compromised after  
243 macrophages infection by the spirochete [38].

244 Leptospiral infection in macrophages induces a dependent p53/p21 cell cycle  
245 arrest [39]. We verified that the p53 target pathway signaling is regulated after virulent  
246 infection by modulation of mRNAs in murine monocyte-machrophages. Homotetrameric  
247 transcription factor p53 is reported to directly regulate 500 target genes, thereby

248 controlling a broad range of cellular processes including cell cycle arrest, cell senescence,  
249 DNA repair, metabolic adaptation and cell death [40].

250 Further results from our study support the idea of cellular apoptosis Caspase-3 and  
251 8 were elevated in all three infected macrophages, regardless of the pathogenicity  
252 notwithstanding, a more pronounced upregulation was induced by the with virulent and  
253 attenuated inoculum of *Leptospira*. Whether macrophage apoptosis induction by  
254 *Leptospira* is form of evasion mechanism or a host defense response to infection,  
255 preventing the spread of infection [jin 35] is still up for debate.

256 Cytokines represent a group of proteins that promote communication between  
257 cells, and their activation is through differentiation, receptor expression and cell-mediated  
258 immunity [41]. This suggests that the virulence factors, expressed or not during the  
259 process of infection of *in vitro* macrophages can guide cell response. In other words,  
260 virulent, culture-attenuated and non-pathogenic samples of *Leptospira* should be able to  
261 activate the murine macrophages, and the gene expression elicited as a result of infection,  
262 is dependent on strain virulence samples. Our results revealed a quantitative and  
263 qualitative association of gene expression with the virulence strains, with the virulent *L.*  
264 *interrogans* upregulating genes related to acute infection and cellular autophagy, unlike  
265 the culture-attenuated and saprophytic strains.

266 A comprehensive overview of gene expression patterns after infection by virulent,  
267 culture-attenuated and saprophytic *Leptospira* spp. strains revealed that inflammation and  
268 immune response, cytokine signaling, DNA repair, cell movement, death and cell  
269 survival were significantly activated following 6 hours of infection. Results demonstrated  
270 a group of genes is responsive to antigens present in the genus *Leptospira*, regardless of  
271 virulence, whereas species and virulence-specific gene expression was also elicited in the  
272 infected macrophages.

## 273 **Methods**

### 274 **Leptospiral Strains**

275 Samples of virulent strain *L. interrogans* sorovar Copenhageni (FIOCRUZ L1-  
276 130), attenuated strain *L. interrogans* sorovar Copenhageni M20 and saprophyte strain  
277 *L. biflexa* sorovar Patoc (FIOCRUZ - Patoc I) that we used in this study were donated by  
278 the Laboratory of Bacterial Zoonosis, Department of Preventive Veterinary Medicine and  
279 Animal Health of School of Veterinary Medicine and Animal Science, University of São  
280 Paulo (FMVZ/USP). All strains were incubated at 30°C in Fletcher semi-solid culture  
281 medium.

### 282 **Macrophage Culture**

283 Murine monocyte-macrophage cells (*Mus musculus* monocyte-macrophage cell  
284 line J774A.1), provided by the Paul Ehrlich cell bank (Rio de Janeiro, Brazil), was used  
285 as described [26]. Cells were maintained at 37° C, 5% CO<sub>2</sub> in RPMI-1640 media (Sigma,  
286 USA) supplemented with 10% heat-inactivated fetal bovine serum (Gibco, USA), 100  
287 ug/mL streptomycin (Sigma Chemical Co St.Louis, MO), 0.03% L-glutamine solution  
288 (Sigma) and 100 UI/mL of penicillin, in 6-well cell culture plates (3cm/well) until  
289 confluency [35].

### 290 **Infection of Macrophages**

291 After the formation of confluent monolayer cells, they were washed three times  
292 in sterile phosphate buffer solution (pH 7.2) for removal of antibiotics and non-adherent  
293 cells. Bacteria were harvested by centrifugation and resuspended in RPMI-1640 media  
294 (Sigma). Cells were then infected (100:1 bacteria:cell) with *L. interrogans* L1-130  
295 (virulent strain), *L. interrogans* M20 (culture-attenuated strain), *L. biflexa* Patoc I  
296 (saprophyte strain), as previously described [40]. Non-infected groups and non-infected  
297 macrophages were used as controls. All infected cells, in biological triplicates, were

298 carried in fresh RPMI-1640, devoid of antibiotics, for 6h at 37° C, 5% CO<sub>2</sub>. Rate of  
299 infection did not differ between strains. At the end of the 6-hour period of infection, RNA  
300 extraction was immediately performed.

### 301 **RNA extraction and Quantification**

302 Total RNA (n=3/experimental group) was extracted from macrophages with  
303 RNeasy Mini Kit (Qiagen, USA) according to manufacturer's instructions. RNA samples  
304 were immediately stored at -80°C. The quantification was performed using a NanoDrop  
305 (ND-2000 spectrophotometer, Thermo Scientific, Wilmington, DE, USA) and the  
306 samples quality was assessed using capillary electrophoresis (Bioanalyzer 2100 Agilent,  
307 Santa Clara, CA, USA). All samples used for microarray analysis had a RIN of 10.

### 308 **Transcriptome Array and Quality control**

309 A WT PLUS Reagent Kit was used to prepare the RNA samples for whole  
310 transcriptome expression analysis with Mouse Genome 2.1 ST Arrays Strip Affymetrix  
311 (Santa Clara, CA, USA), according to the manufacturer's protocols. Briefly, 100 ng of  
312 control RNA sample (Hela cells) was prepared to contain spiked in Poly-A RNA controls  
313 (lys, phe, thr and dap) absent in eukaryotic cells and mixed together with RNA samples to  
314 generate cDNA. After the amplification process, final cDNA was purified, quantified,  
315 fragmented and then labeled for hybridization to the strips, for 20h at 48°C in the  
316 hybridization oven. Finally, strips were processed using the GeneAtlas Hybridization,  
317 Wash, Stain Kit for WT Array Strips (Affymetrix) and scanned using the GeneAtlas®  
318 System (Affymetrix) generating the raw cell files. Raw intensity values in the cell files  
319 were background corrected, log<sub>2</sub> transformed and then quantile normalized by the  
320 software Expression Console (Affymetrix) using the Robust Multi-array Average (RMA)  
321 algorithm.

322

### 323 **Identification of differentially expressed genes and functional enrichment**

324 In order to identify differentially expressed genes, we utilized the software  
325 Transcriptome Analysis Console (Affymetrix), where statistical analysis was performed  
326 by one-way ANOVA (fold change  $\pm$  2, FDR corrected  $p < 0.05$ ). For the purpose of  
327 functional enrichment of the expression profiles obtained for each treatment, we used the  
328 Ingenuity Pathway Analysis (IPA) software (Qiagen).

### 329 **Validation of transcriptome results by qRT-PCR**

330 For the validation of gene expression of selected genes in infected macrophages  
331 (saprophyte, culture-attenuated and virulent strains) and non-infected control  
332 macrophages, RNA samples were reverse transcribed (1 $\mu$ g of total RNA/sample) using  
333 the Moloney Murine Leukemia Virus (MML-V) enzyme (Life Technologies) and Oligo-  
334 dT Primers. All primers were designed to span at least one intron, to avoid repeat regions  
335 and similarities to other non-specific genomic regions. Mouse genome sequence,  
336 available on the University of California, Santa Cruz (UCSC) Genome Browser, was  
337 employed for primer design, using the Primer3 program [41]. PCR was performed using a  
338 Stratagene QPCR Systems Mx3005P (Agilent Technologies, Santa Clara, CA, USA)  
339 using the QuantiTect SYBR Green PCR kit (Qiagen). Expression levels were determined  
340 using standard curves for all genes at each individual run, and the expression of the  
341 candidate gene is presented as a ratio to an unregulated endogenous control ( $\beta$ -actin).  
342 The primers used for qPCR validation are listed in Table 2.

343 Table 2. The primers used for qPCR validation.

| <b>GENE</b>                    | <b>Forward</b>       | <b>Reverse</b>       |
|--------------------------------|----------------------|----------------------|
| <b>IL-1<math>\beta</math></b>  | TCATTGTGGCTGTGGAGAAG | AGCTCATATGGGTCCGACAG |
| <b>NOS2</b>                    | GACGAGACGGATAGGCAGAG | CACATGCAAGGAAGGGAAGT |
| <b>TNF-<math>\alpha</math></b> | CGAGTGACAAGCCTGTAGCC | CGAGTGACAAGCCTGTAGCC |

344



## 345 **Statistical analysis**

346 Differential expression of each gene was determined by one-way ANOVA with  
347 two criteria, a fold change of  $\pm 2$  comparing all infected groups to the non-infected control  
348 and a Benjamini-Hochberg (BH) corrected p-value (FDR) $<0.05$ . For pathways  
349 enrichment analysis on the Ingenuity Pathway Analysis (IPA) software (Qiagen),  
350 multiple testing was also (BH corrected (p $<0.05$ ). Real-time PCR data were analyzed  
351 using least-squares analysis of variance and the general linear model procedures of SAS  
352 (SAS Institute, Cary, NC, USA; p  $<0.01$ ). Comparison of means was done using  
353 Duncan's multiple range test.

## 354 **Ethics Statement**

355 The present study was approved by the Research Ethics Committee of São Paulo  
356 State University (FMVA- UNESP), under the protocol number 2015-00895. No animal  
357 experimentation was performed in the experiments described herein.

358

## 359 **Acknowledgments**

360 The authors would like to thanks Dr. Marcos Bryan Heinemann by graciously  
361 providing the *Leptospira* spp., and to Cilene Vudovix Táparo for her valuable assistance  
362 during the experiments.

363

## 364 **References**

- 365 1. Levett PN. Leptospirosis. Clin Microbiol Rev. 2001; 14: 296-326.
- 366 2. Picardeau M, Bulach DM, Bouchier C, Zuerner RL, Zidane N, et al. Genome  
367 sequence of the saprophyte *Leptospira biflexa* provides insights into the evolution of  
368 *Leptospira* and the pathogenesis of leptospirosis. PLoS One. 2008; 3:e1607.

- 369 3. Adler B. History of leptospirosis and *Leptospira*. *Curr Top Microbiol Immunol*.  
370 2015; 387:1–9.
- 371 4. Costa F, Hagan JE, Calcagno J, Kane M, Torgerson P, Martinez-Silveira MS, et  
372 al. Global Morbidity and Mortality of Leptospirosis: A Systematic Review. *PLoS Negl*  
373 *Trop Dis*. 2015;9(9):e0003898
- 374 5. Bhart AR, Nally JE, Ricaldi JN, Matthias MA, Diaz MM, Lovett MA, et al.  
375 Leptospirosis: a zoonotic disease of global importance. *Lancet Infect Dis*. 2003; 3:757-  
376 71.
- 377 6. Ko A, Goarant C, Picardeau M. *Leptospira*: the dawn of the molecular genetics  
378 for an emerging zoonotic pathogen. *Nature*. 2009; 7:736-47.
- 379 7. Lau CL, Smythe LD, Craig SB, Weinstein P. Climate Change, Flooding,  
380 Urbanisation and Leptospirosis: Fuelling the fire? *Trans R Soc Trop Med Hyg*. 2010;104:  
381 631–638.
- 382 8. Torgerson PR, Hagan JE, Calcagno J, Kane M, Martinez-Silveira MS, Goris  
383 MGA, et al. Global burden of Leptospirosis: estimated in terms of disability adjusted life  
384 years. *PLoS Neglec Trop Dis*. 2015; 9:10e0004122
- 385 9. Lourdault K, Matsunaga J, Haake DA. High-throughput parallel sequencing to  
386 measure fitness of *Leptospira interrogans* transposon insertion mutants during acute  
387 infection. *PLoS neglec trop dis*. 2016;10(11):e0005117.
- 388 10. Coker R, Rushton J, Maurier-Jack S, Karimuribo E, Lutumba P, Kambarage D, et  
389 al. Towards a conceptual framework to support one health research for policy on  
390 emerging zoonoses. *Lancet Infect Dis*. 2011; 11(4): 326-31.
- 391 11. Adler B, de la Peña Moctezuma A. *Leptospira* and leptospirosis. *Vet Microbiol*.  
392 2009; 140: 287-96.

- 393 12. Hall-Stoodley L, Stoodley P. Biofilme formation and dispersal and the  
394 transmission of human pathogens. *Trends Microbiol.* 2005; 13:7-10.
- 395 13. Iraola G, Spangenberg L, Lopes Bastos B, et al. Transcriptome Sequencing  
396 Reveals Wide Expression Reprogramming of Basal and Unknown Genes in *Leptospira*  
397 *biflexa* Biofilms. McMahon K, ed. *mSphere.* 2016;1(2):e00042-16.
- 398 14. Adler B, Faine S. Susceptibility of mice treated with cyclophosphamide to lethal  
399 infection with *Leptospira interrogans* serovar pomona. *Infect Immun.* 1976;14:703–708.
- 400 15. Murray GL, Srikrum A, Henry R, Hartskeerl RA, Sermswan RW, Adler B.  
401 Mutations affecting *Leptospira interrogans* lipopolysaccharide attenuate virulence. *Mol*  
402 *Microbiol.* 2010;78(3):701–9.
- 403 16. Murray GL, Ellis KM, Lo M, Adler B. *Leptospira interrogans* requires a  
404 functional heme oxygenase to scavenge iron from hemoglobin. *Microbes Infect.*  
405 2008;10:791-797.
- 406 17. Ristow P, Bourhy P, da Cruz McBride FW, Figueira CP, Huerre M, Ave P, et al.  
407 The OmpA-like protein Loa22 is essential for leptospiral virulence. *PLoS Pathog.* 2007;  
408 3(7):e97.
- 409 18. Davis JM, Haake DA, Ramakrishnan L. *Leptospira interrogans* stably infects  
410 zebrafish embryos, altering phagocyte behavior and homing to specific tissues. *PLoS*  
411 *Negl Trop Dis.* 2009; 3: e463.
- 412 19. Gordon S. Phagocytosis: an immunobiologic process. *Immunity.* 2016;  
413 44(3):463–75.
- 414 20. Kaufmann SH, Dorhoi A. Molecular determinants in phagocyte-bacteria  
415 interactions. *Immunity.* 2016; 44(3):476–91.

- 416 21. Li S, Ojcius DM, Liao S, Li L, Xue F, et al. Replication or death: distinct fates of  
417 pathogenic *Leptospira* strain Lai within macrophages of human or mouse origin. *Innate*  
418 *Immun.* 2010;16:80-92.
- 419 22. Nahori MA, Fournie-Amazouz E, Que-Gewirth NS, Balloy V, Chignard M, et al.  
420 Differential TLR recognition of leptospiral lipid A and lipopolysaccharide in murine and  
421 human cells. *J Immunol.* 2005;175: 6022–6031.
- 422 23. Vernel-Pauillac F, Merien F. Proinflammatory and immunomodulatory cytokine  
423 mRNA time course profiles in hamsters infected with a virulent variant of *Leptospira*  
424 *interrogans*. *Infect Immun.* 2006; 74:4172-4179.
- 425 24. Marinho M, Oliveira-Junior IS, Monteiro CMR, Perri SH, Salomão R. Pulmonary  
426 disease in hamster infected with *Leptospira interrogans*: histopathologic findings and  
427 cytokine mRNA expressions. *Am J Trop Med Hyg.* 2009;80:832-36.
- 428 25. Patarakul K, Lo M, Adler B. Global transcriptomic response of *Leptospira*  
429 *interrogans* serovar Copenhageni upon exposure to serum. *BMC Microbiol.* 2010;10:(31).
- 430 26. de Araújo Junior EC, Garcia LE, Melo LM, Bragato JP, de Lima VMF, Peiró JR,  
431 et al. Transcriptome datasets of macrophages infected with different strains of *Leptospira*  
432 spp. *Data in Brief.* 2018;16:1044-1050.
- 433 27. Nathan C, Ding A. TREM-1: a new regulator of innate immunity in sepsis  
434 syndrome. *Nature.* 2001;5:7;530-32.
- 435 28. Colonna M, Facchetti F. TREM-1 (Triggering Receptor Expressed on Myeloid  
436 Cells): a new player in acute inflammatory responses. *The J. of Infect. Dis.* 2003; 187  
437 (Suppl 2): 5397-401.
- 438 29. Padayatty SJ, Katz A, Wang Y, Eck P, Kwon O, Lee JH, et al. Vitamin C as an  
439 antioxidant: evaluation of its role in disease prevention. *J. Am. Coll. Nutr.* 2003;22(1):18-  
440 35.

- 441 30. Bouchon A, Fachhetti F, Weigand MA, Colonna M. TREM-1 amplifies  
442 inflammations and is a crucial mediator of septic shock. *Nature*. 2001; 410. 1103-1107.
- 443 31. Iskandar BJ, William T, Daisy VJ. Cytokine profile of patients with leptospirosis  
444 in Sabah, Malaysia. *Med J Malaysia*, 2018;73(2):106-109.
- 445 32. Schulte W, Bernhagen J, Bucala R. Cytokines in sepsis: potent immunoregulators  
446 and potential therapeutic target-an updated view. *Mediators Inflamm*. 2013:165974.
- 447 33. Reis EA, Ribeiro GS, Teixeira-Carvalho A, Martins-Filho OA, Montgomery RR,  
448 et al. Cytokine response signatures in disease progression and development of severe  
449 clinical outcomes for leptospirosis. *PLoS Negl Trop Dis*. 2013; 7(9):e2457.
- 450 34. Shaltiei IA, Krenning L, Bruinsma W, Medema RH. The same, only different -  
451 DNA damage checkpoint and their reversal throughout the cell cycle. *J Cell Sci*. 2015;  
452 128:1-14.
- 453 35. Jin D, Ojcius DM, Sun D, Donh H, Luo Y, May Y, et al. *Leptospira interrogans*  
454 induces apoptosis in macrophages via caspase-8 and caspase-3-dependent pathways.  
455 *Infect and Immunity*. 2009; 77(2):799-809.
- 456 36. Garcia LE, de Araújo Junior EC, Melo LM, Bragato JP, Peiró JR, et al.  
457 Characterization of the microtranscriptome of macrophages infected with virulent,  
458 attenuated and saprophyte strains of *Leptospira* spp. *PLoS Negl. Trop. Dis*.  
459 2018;12(7):e0006621.
- 460 37. Hu W, Ge Y, Ojcius DM, Sun D, Dong H, Yang XF, et al. P53 Signalling  
461 Controls Cell Cycle Arrest And Caspase-Independent Apoptosis In Macrophages Infected  
462 With Pathogenic *Leptospira* Species. *Cell Microbiol*. 2013;15(10):1624–59.
- 463 38. Aubrey BJ, Kelly GL, Janic A, Herold MJ, Strasser A. How does this relate to  
464 p53-mediated tumour suppression? *Cell Death Differ*. 2018;25(1):104-113.

465 39. Van der Meide PH, Schellekens H. Cytokines and the immune response.  
466 Biotherapy. 1996;8(3-4):243-9.

467 40. Xue F, Zhao X, Yang Y, Zhao J, Yang Y, Cao Y, et al. Responses of Murine and  
468 Human Macrophages to Leptospiral Infection: A Study Using Comparative Array  
469 Analysis. PLoS Negl Trop Dis. 2013; 7(10): e2477.

470 41. Rozen S, Skaletsky H. Primer3 on the www for general users and for biologist  
471 programmers. Methods Mol. Biol. 2000;132:365-86.

472

### 473 **Supporting information**

474 **S1 Table. DEGs (gene symbol) modulated by macrophages at 6h of infection by**  
475 **different strains of *Leptospira* spp.**

476

477

478

479

480

481

482

483

484

485

486

487

488

489

490

491

492

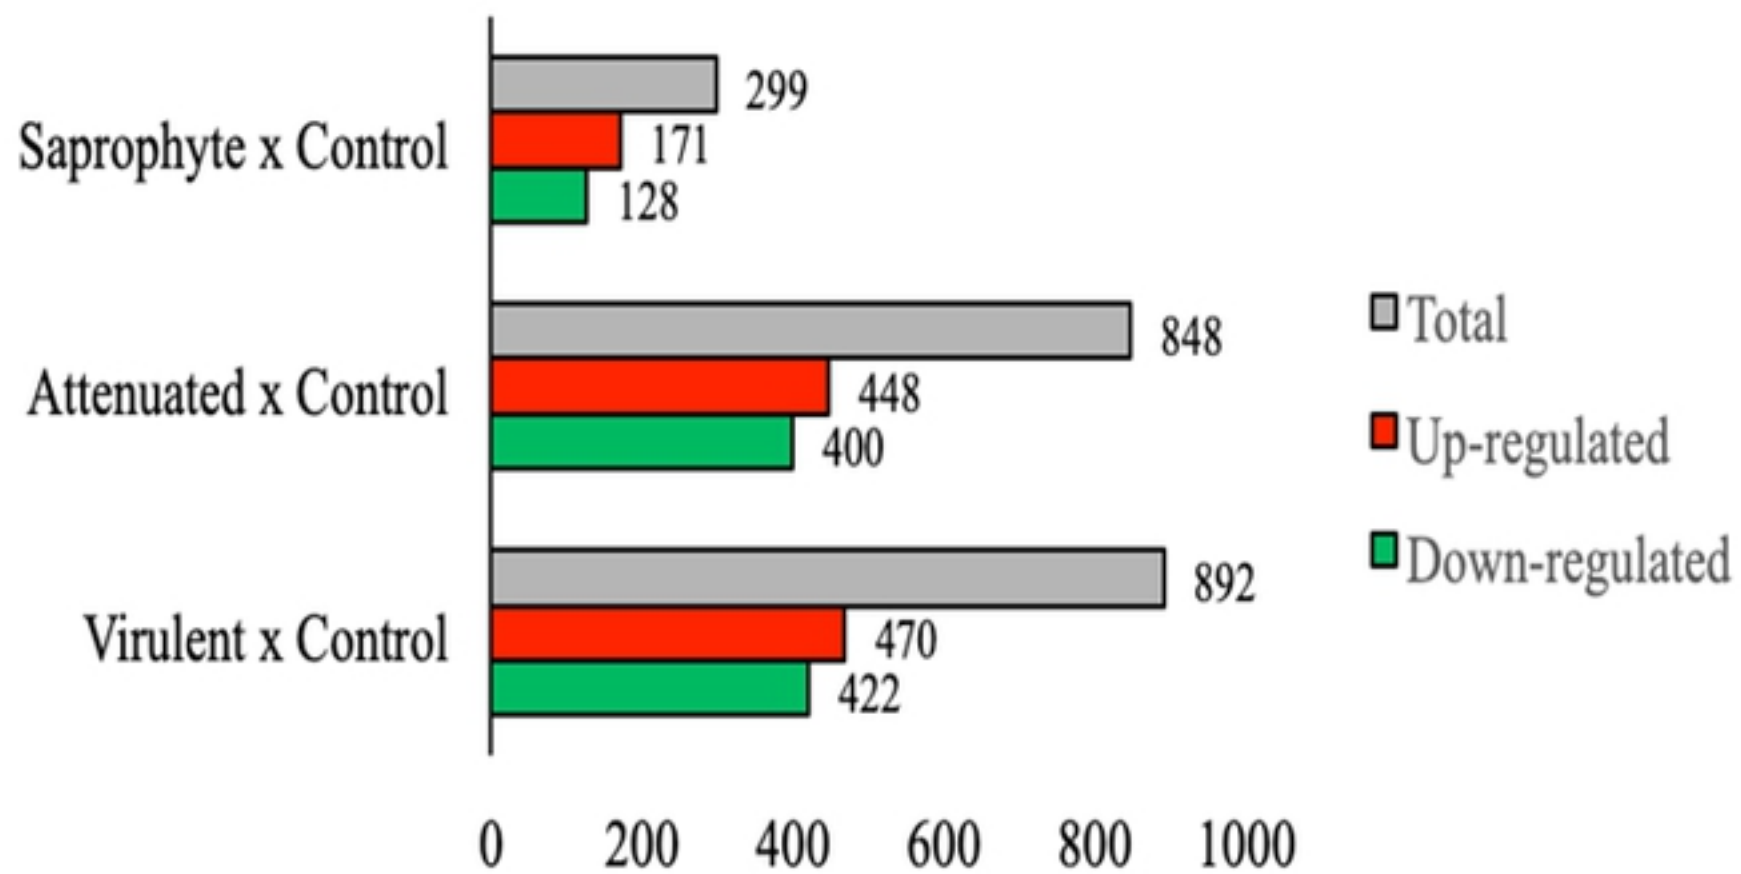

Fig1



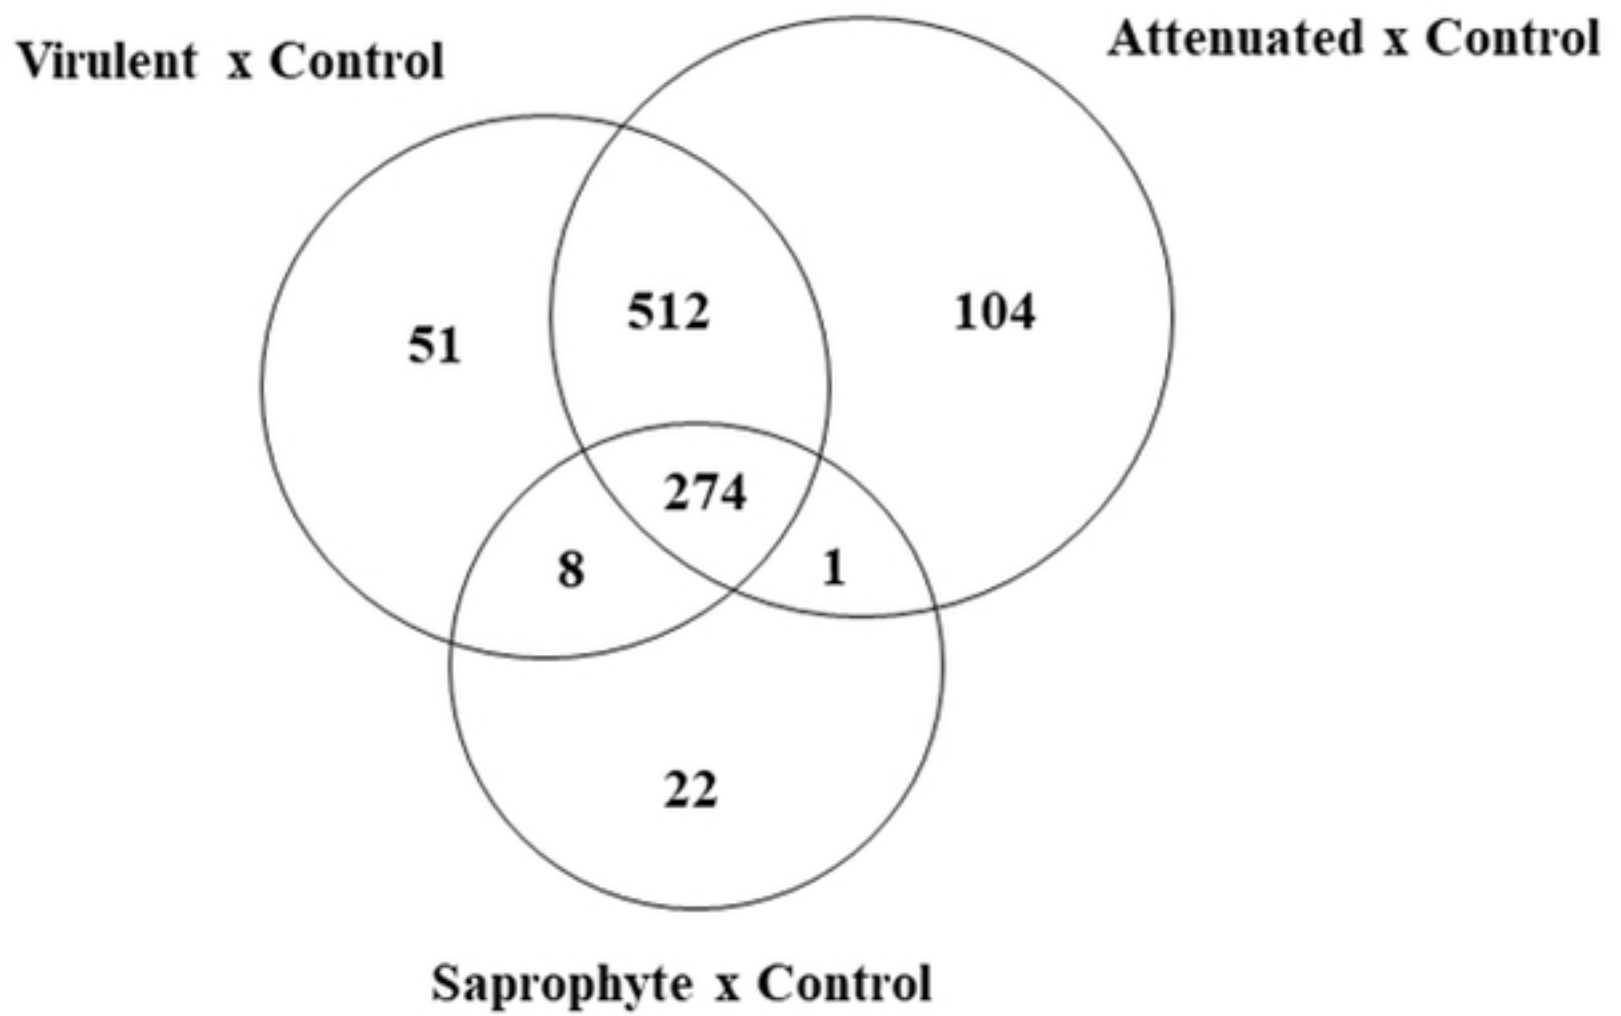

Fig2

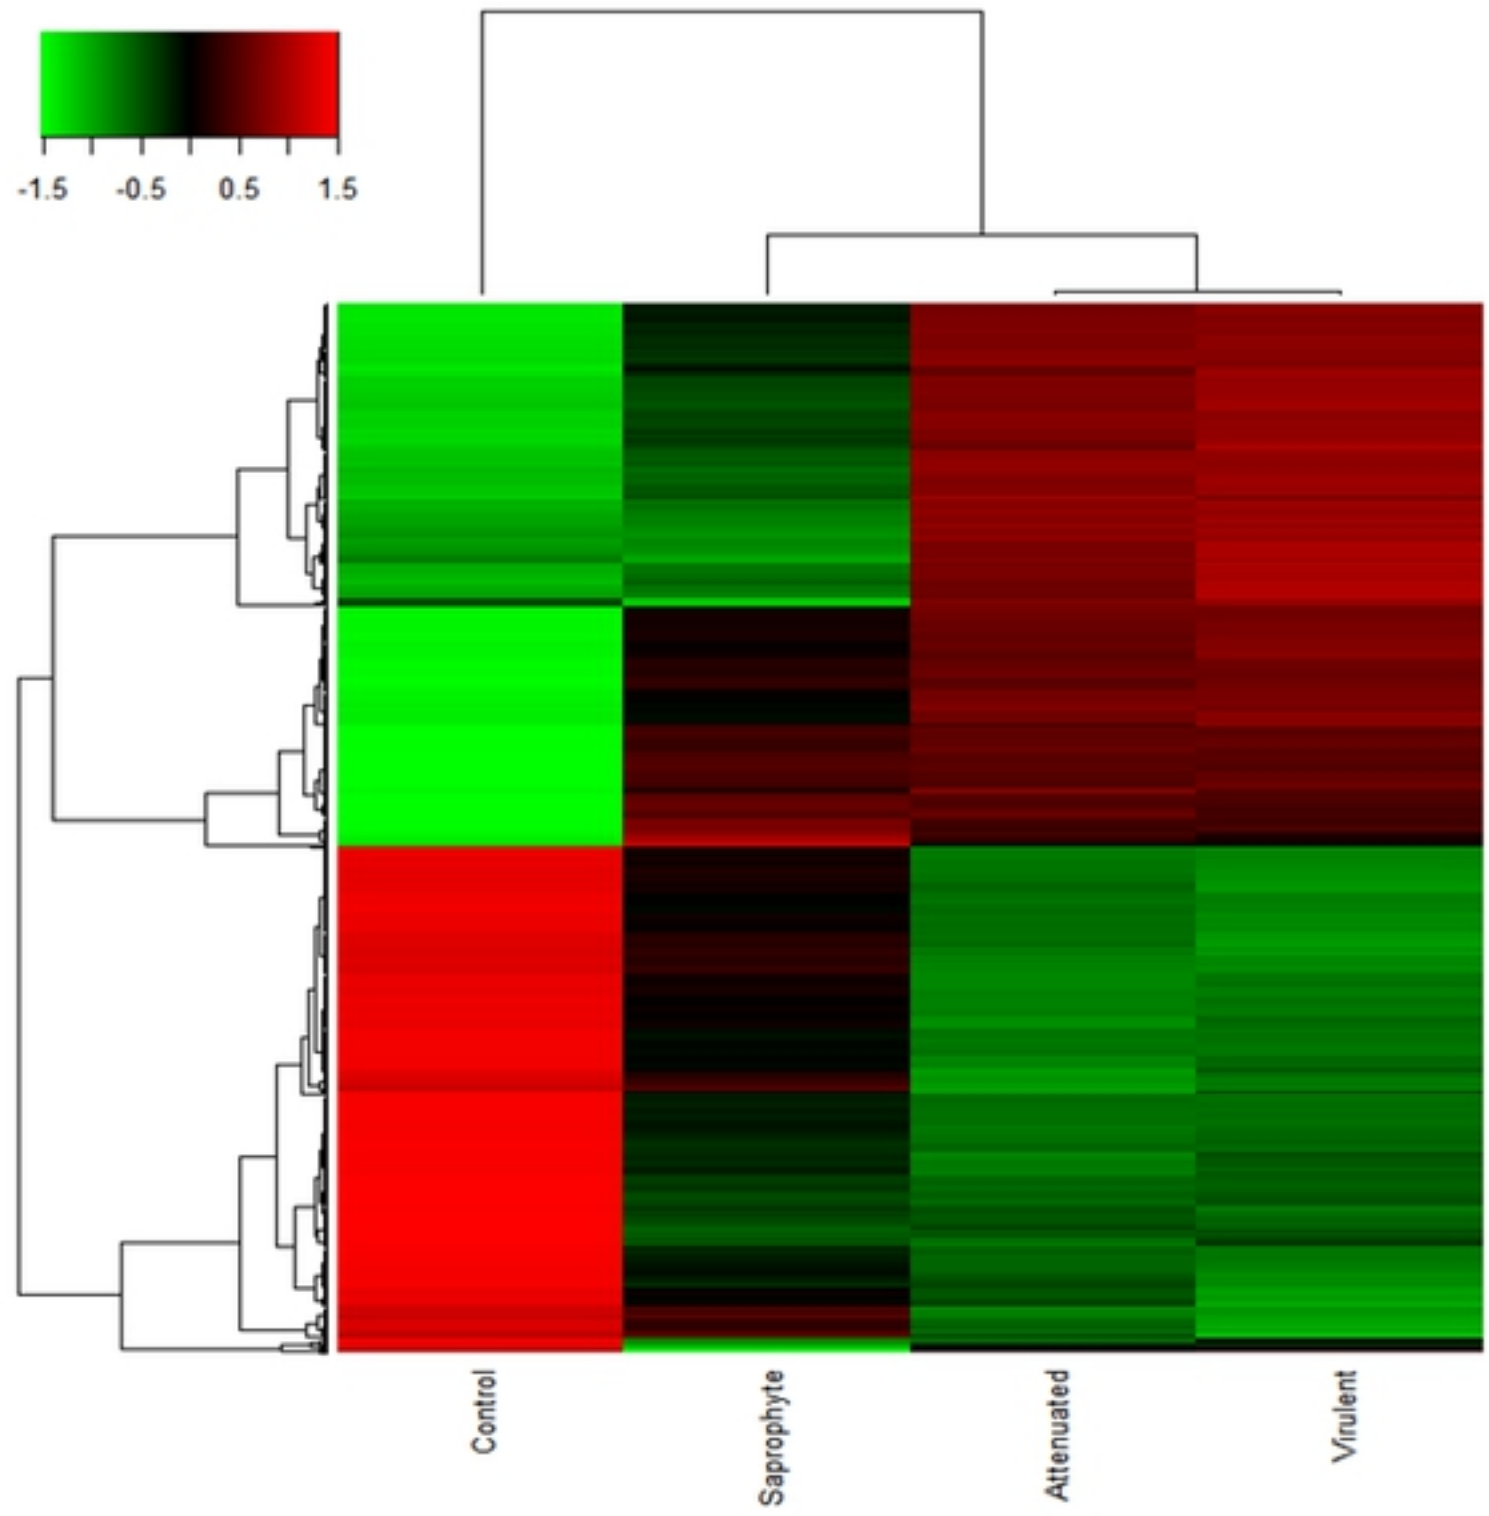

Fig3

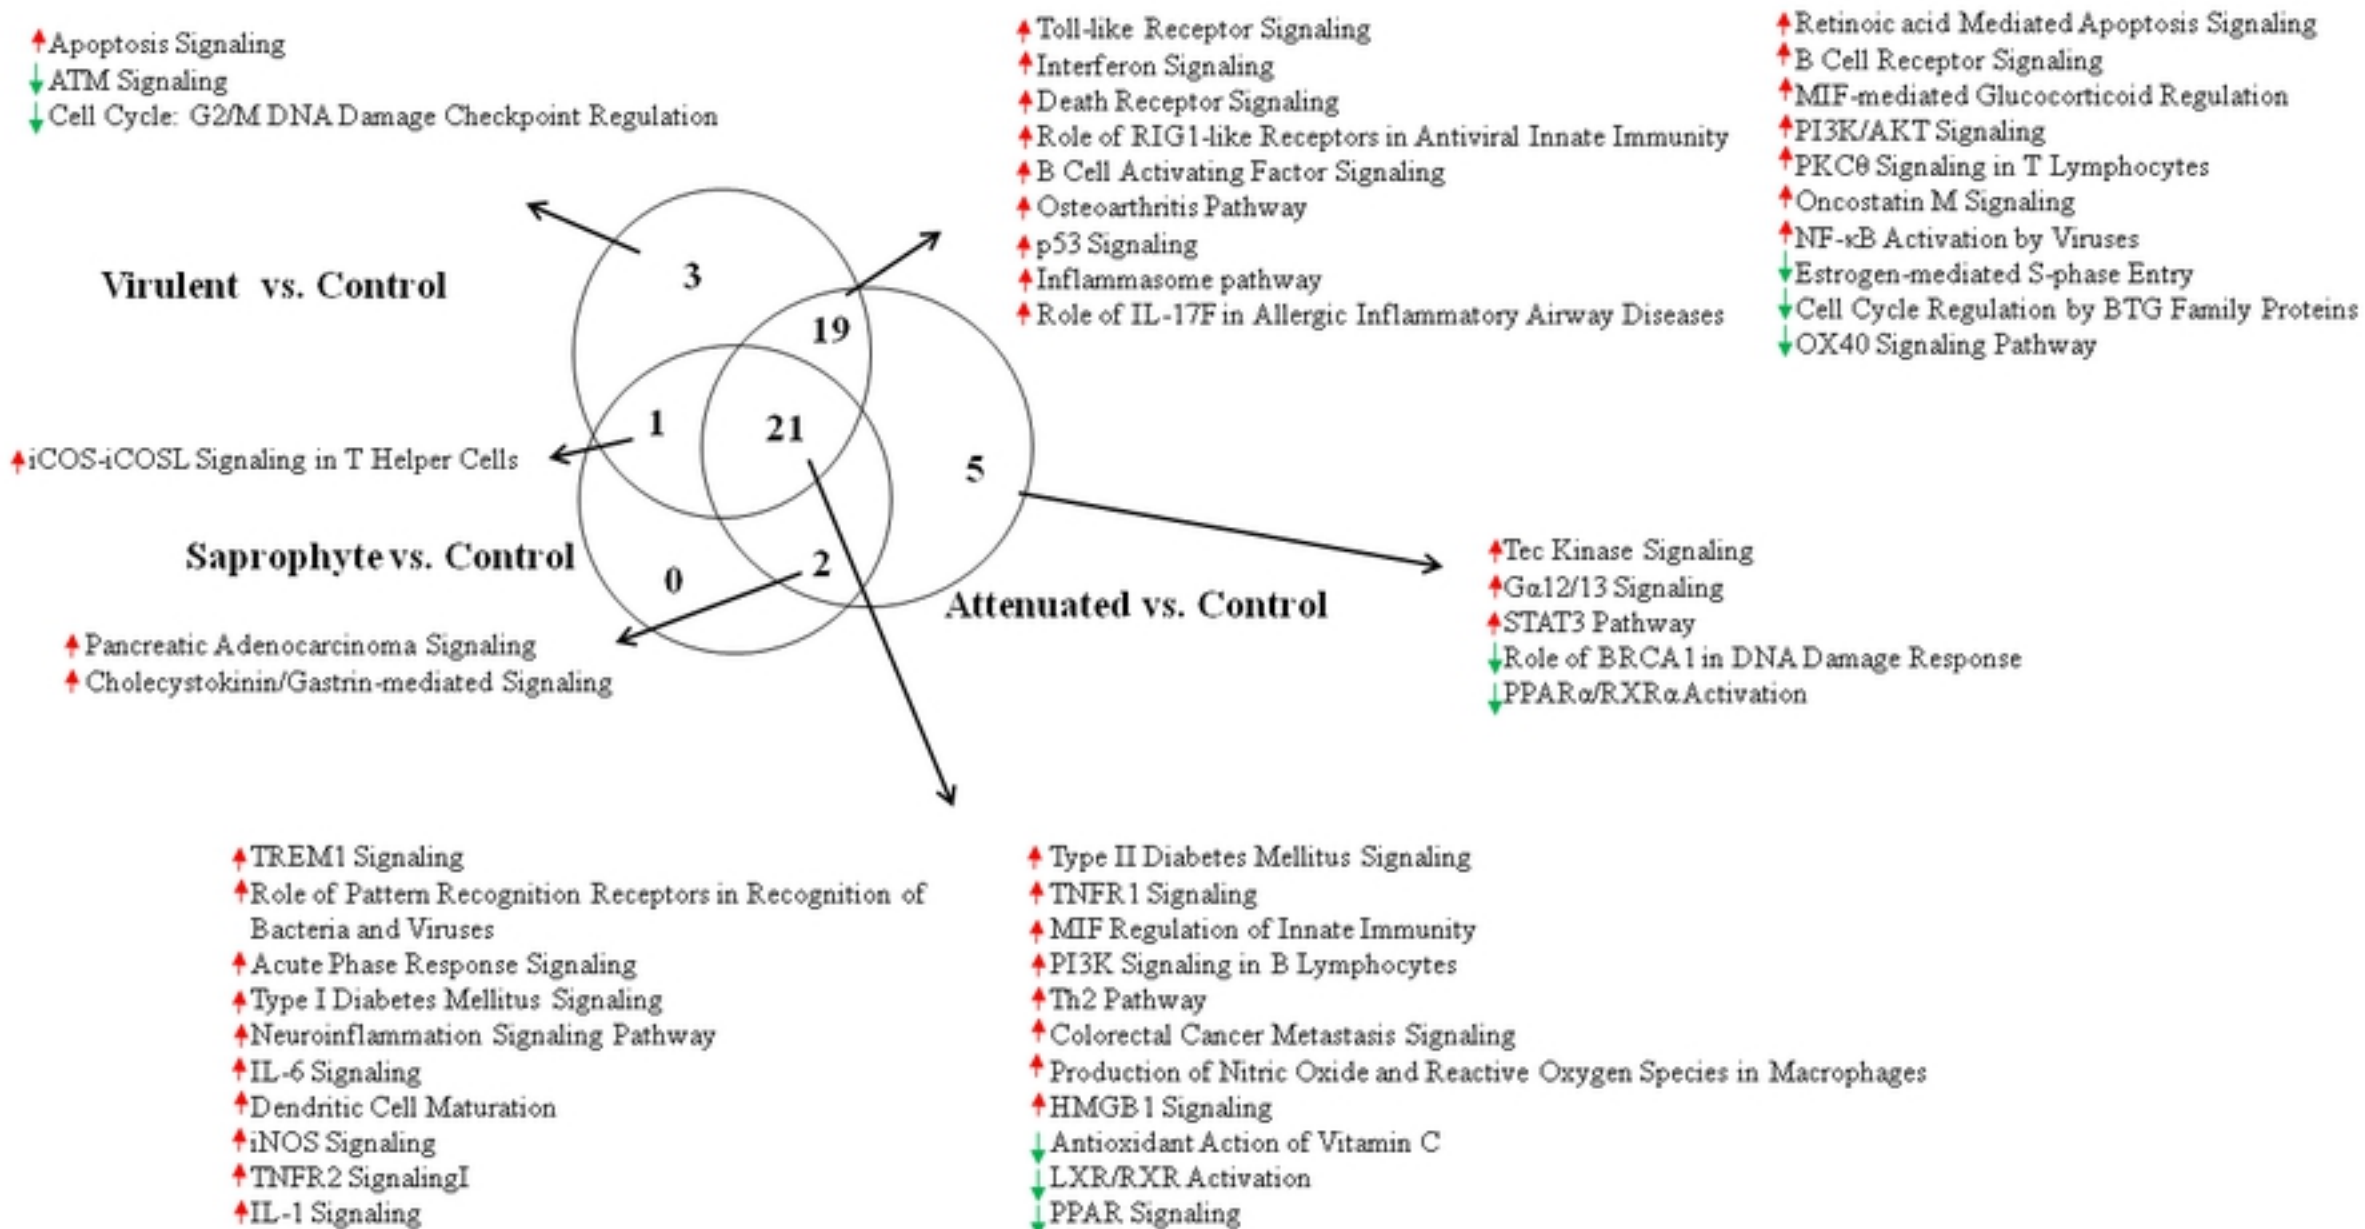

Fig4

Extracellular Space

Cytoplasm

bioRxiv preprint doi: <https://doi.org/10.1101/619023>; this version posted April 25, 2019. The copyright holder for this preprint (which was not certified by peer review) is the author/funder, who has granted bioRxiv a license to display the preprint in perpetuity. It is made available under aCC-BY 4.0 International license.

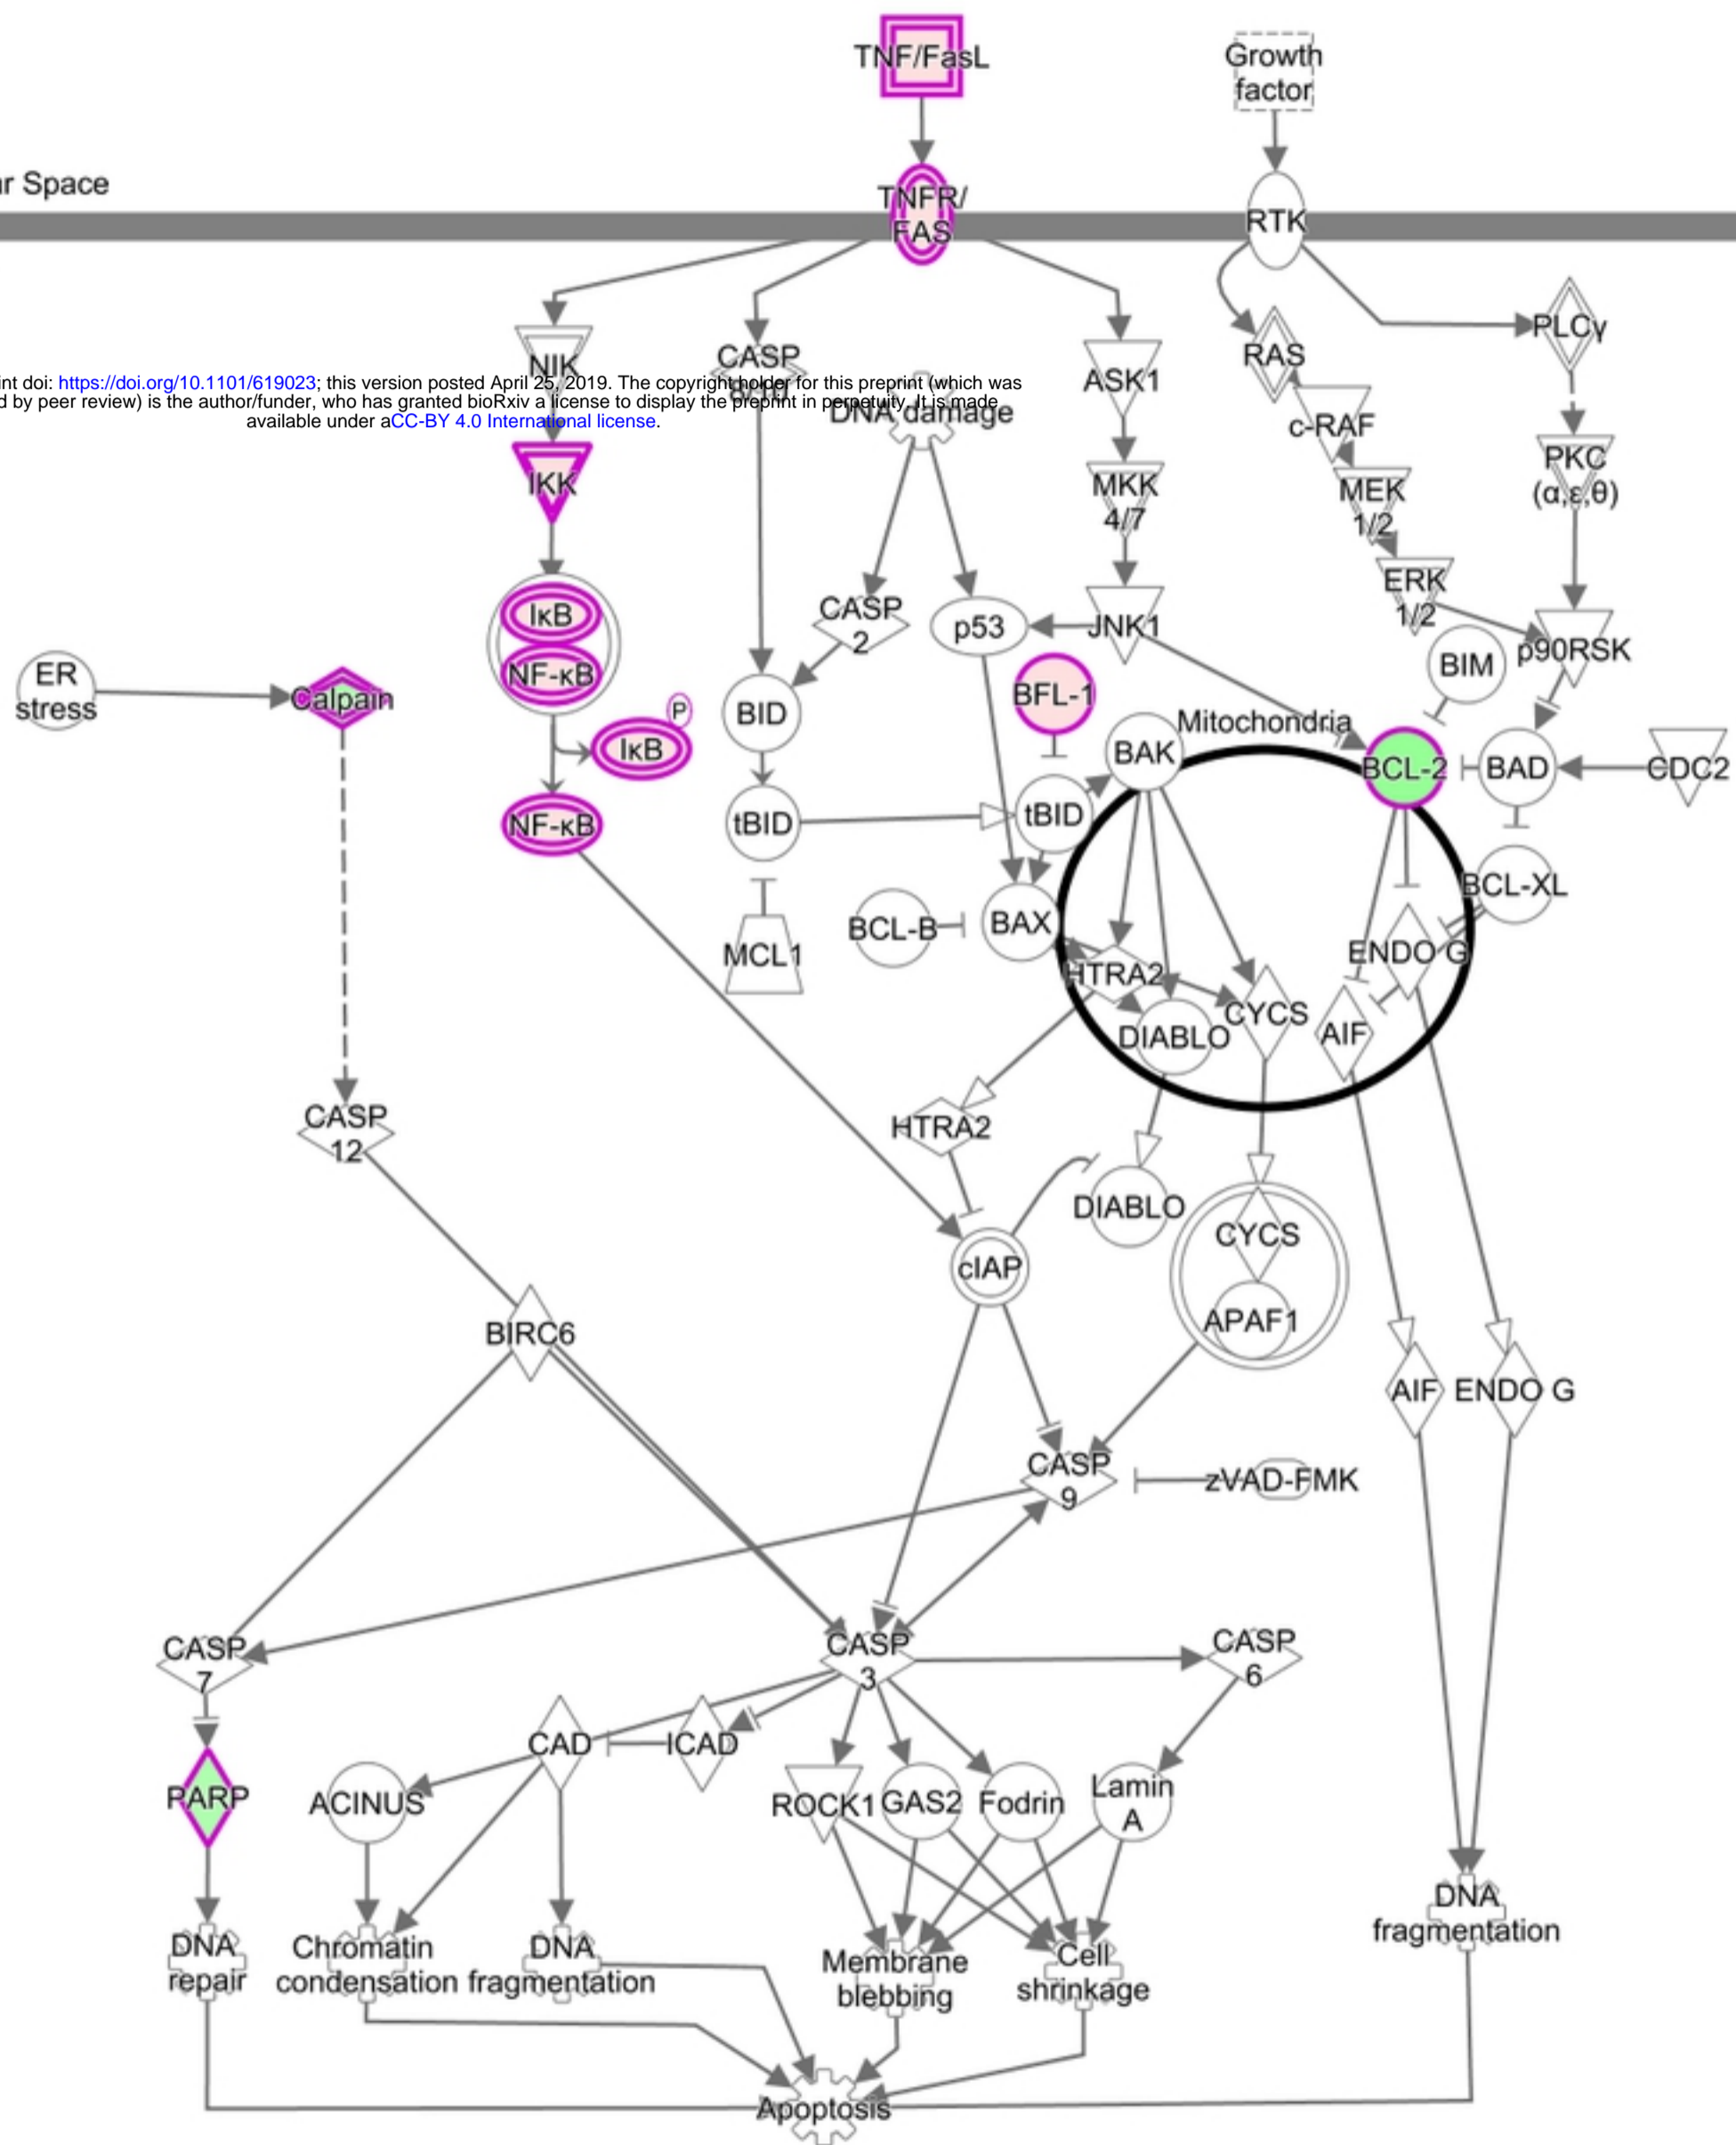

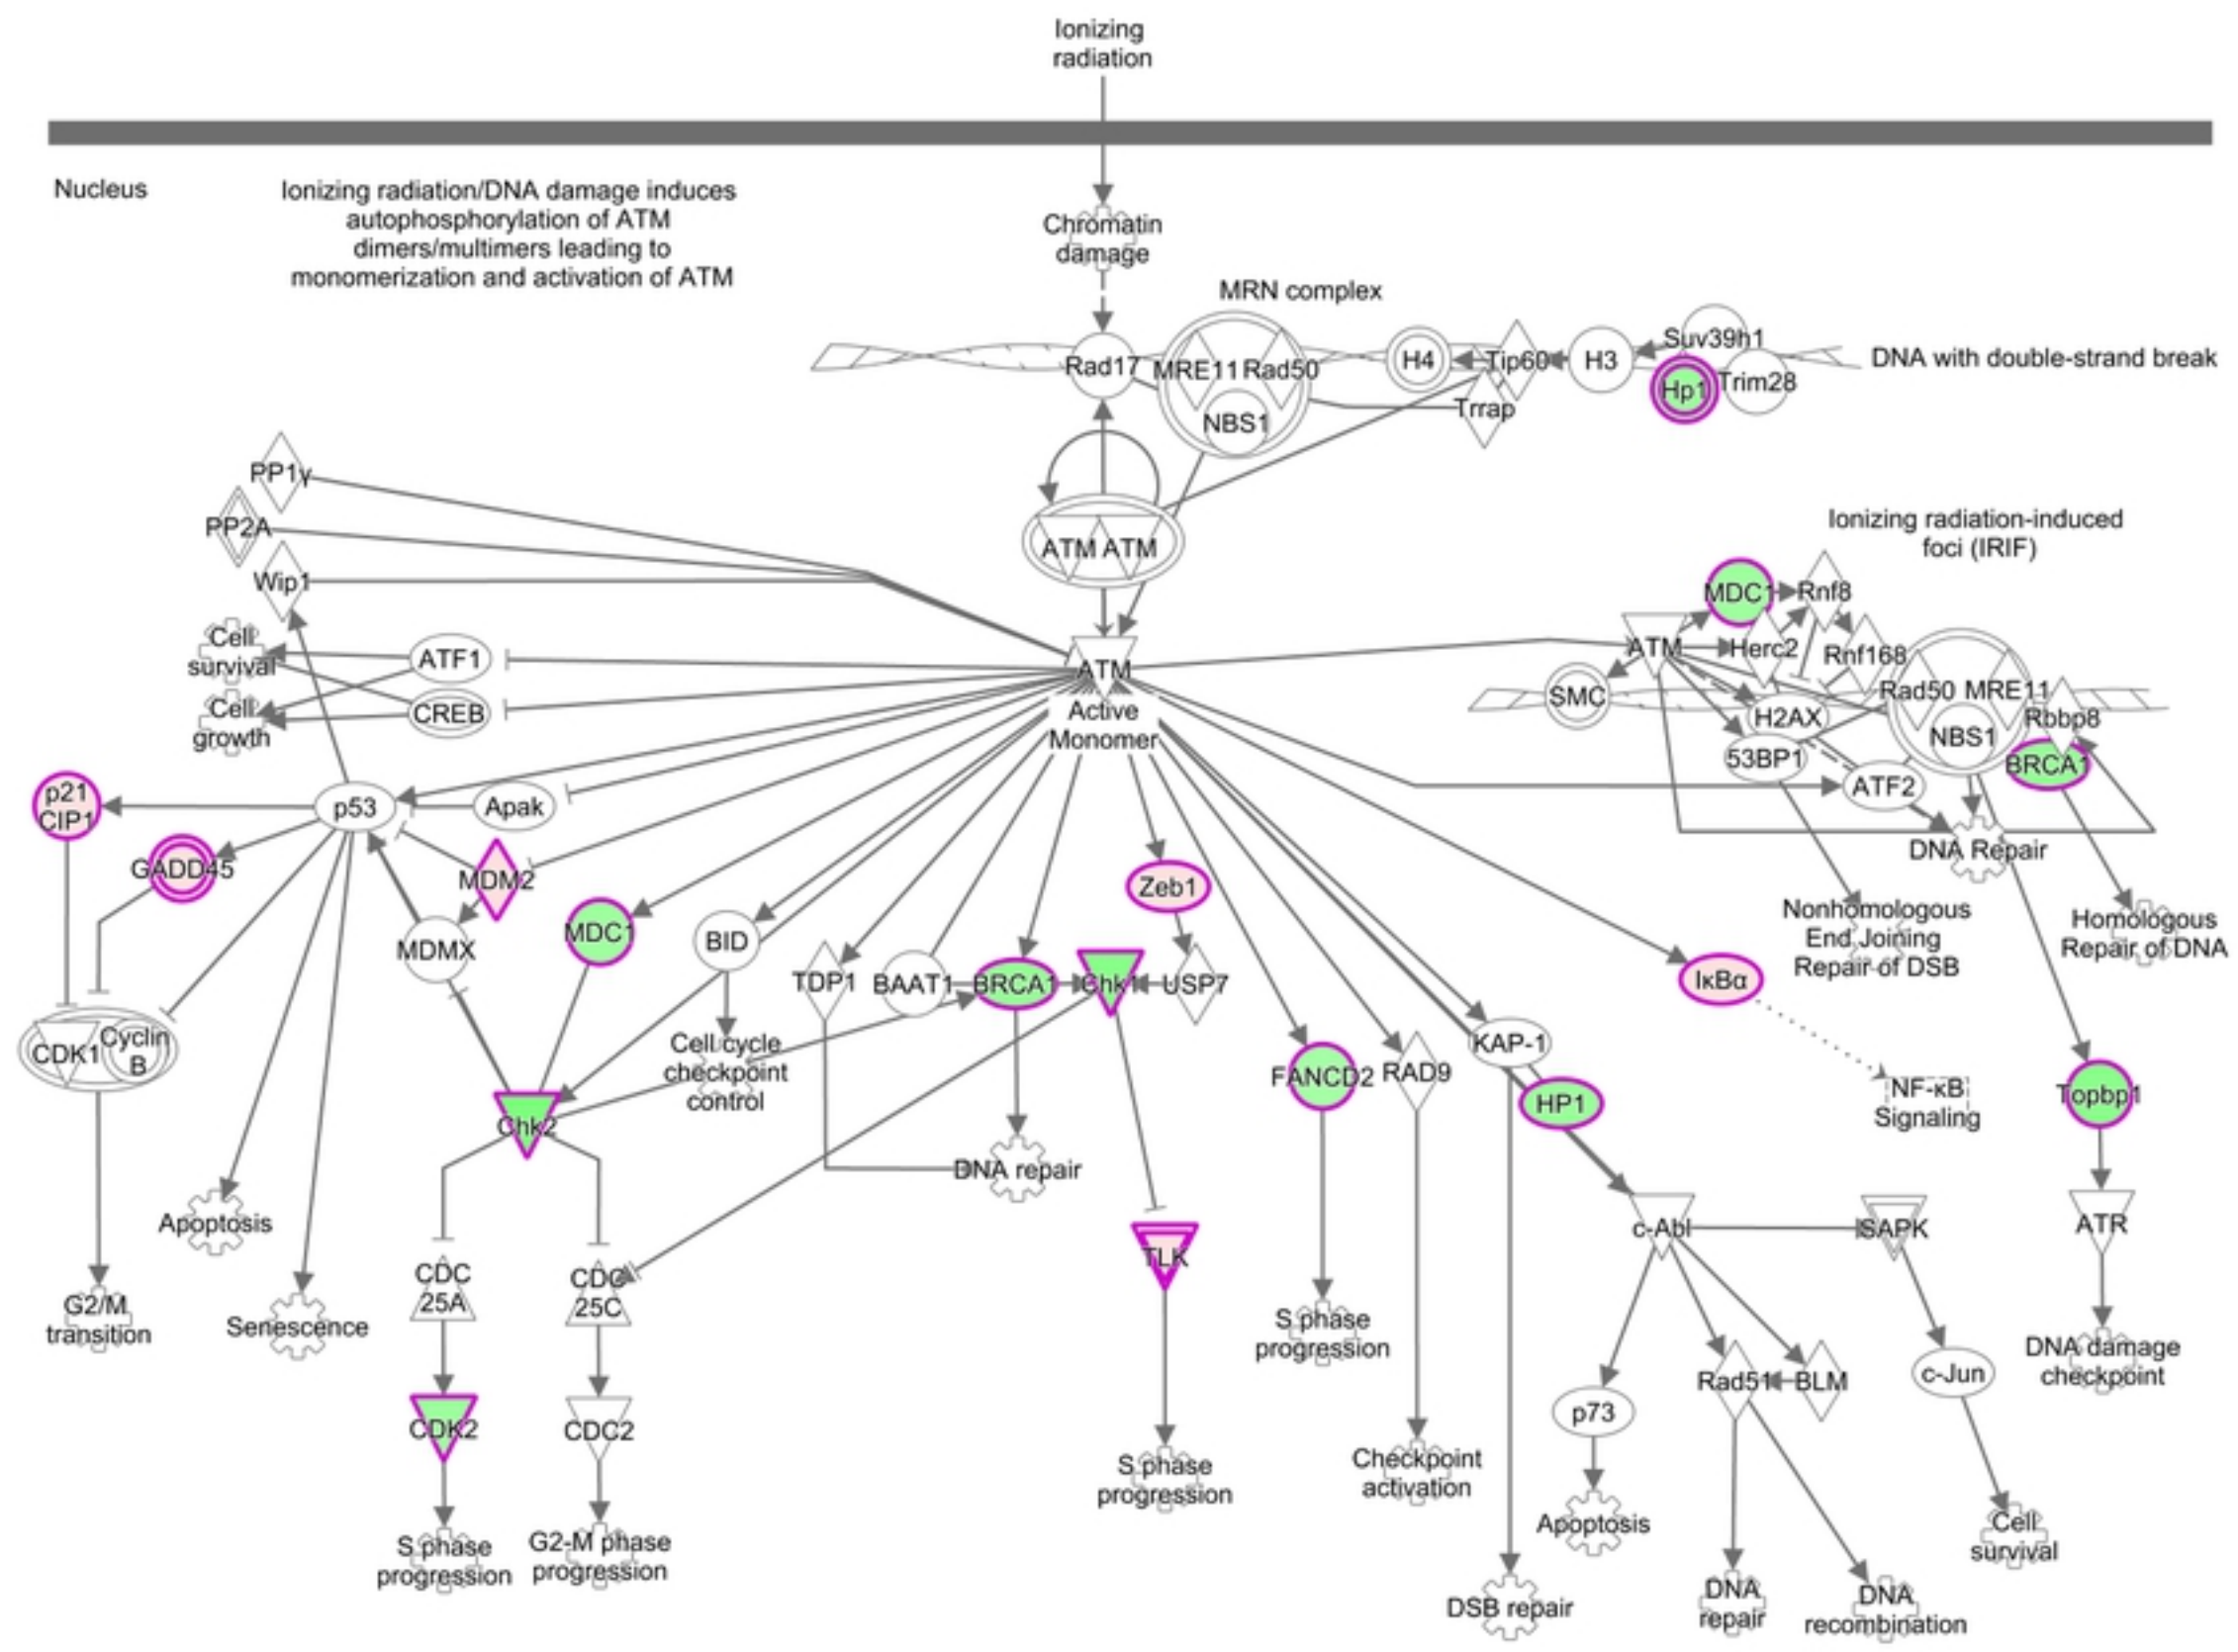

Fig5B

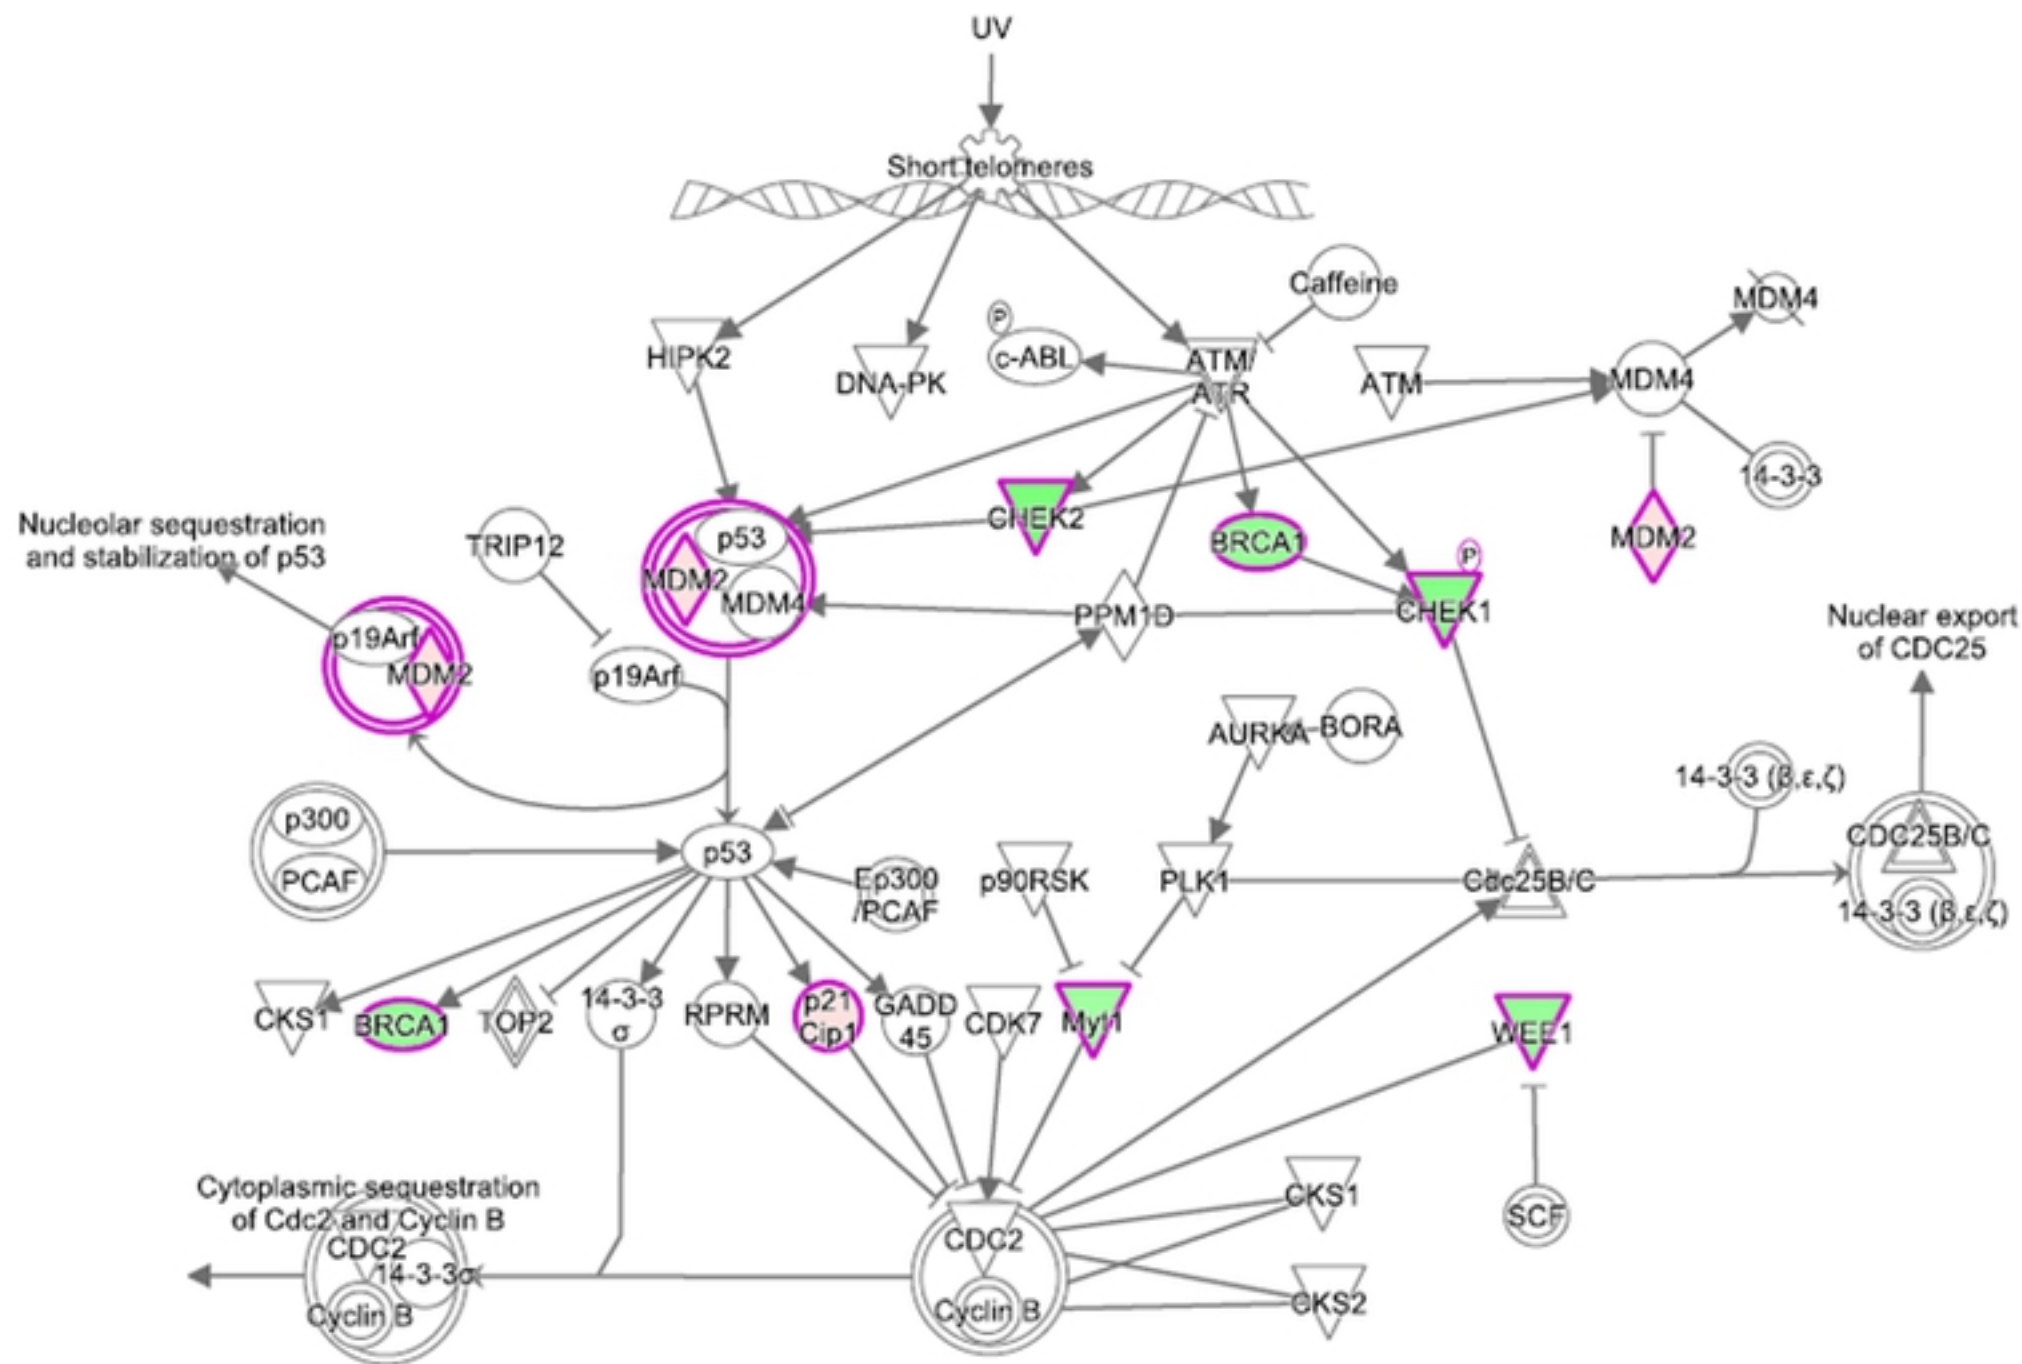

Relative Expression TNF $\alpha$ / $\beta$ -Actin

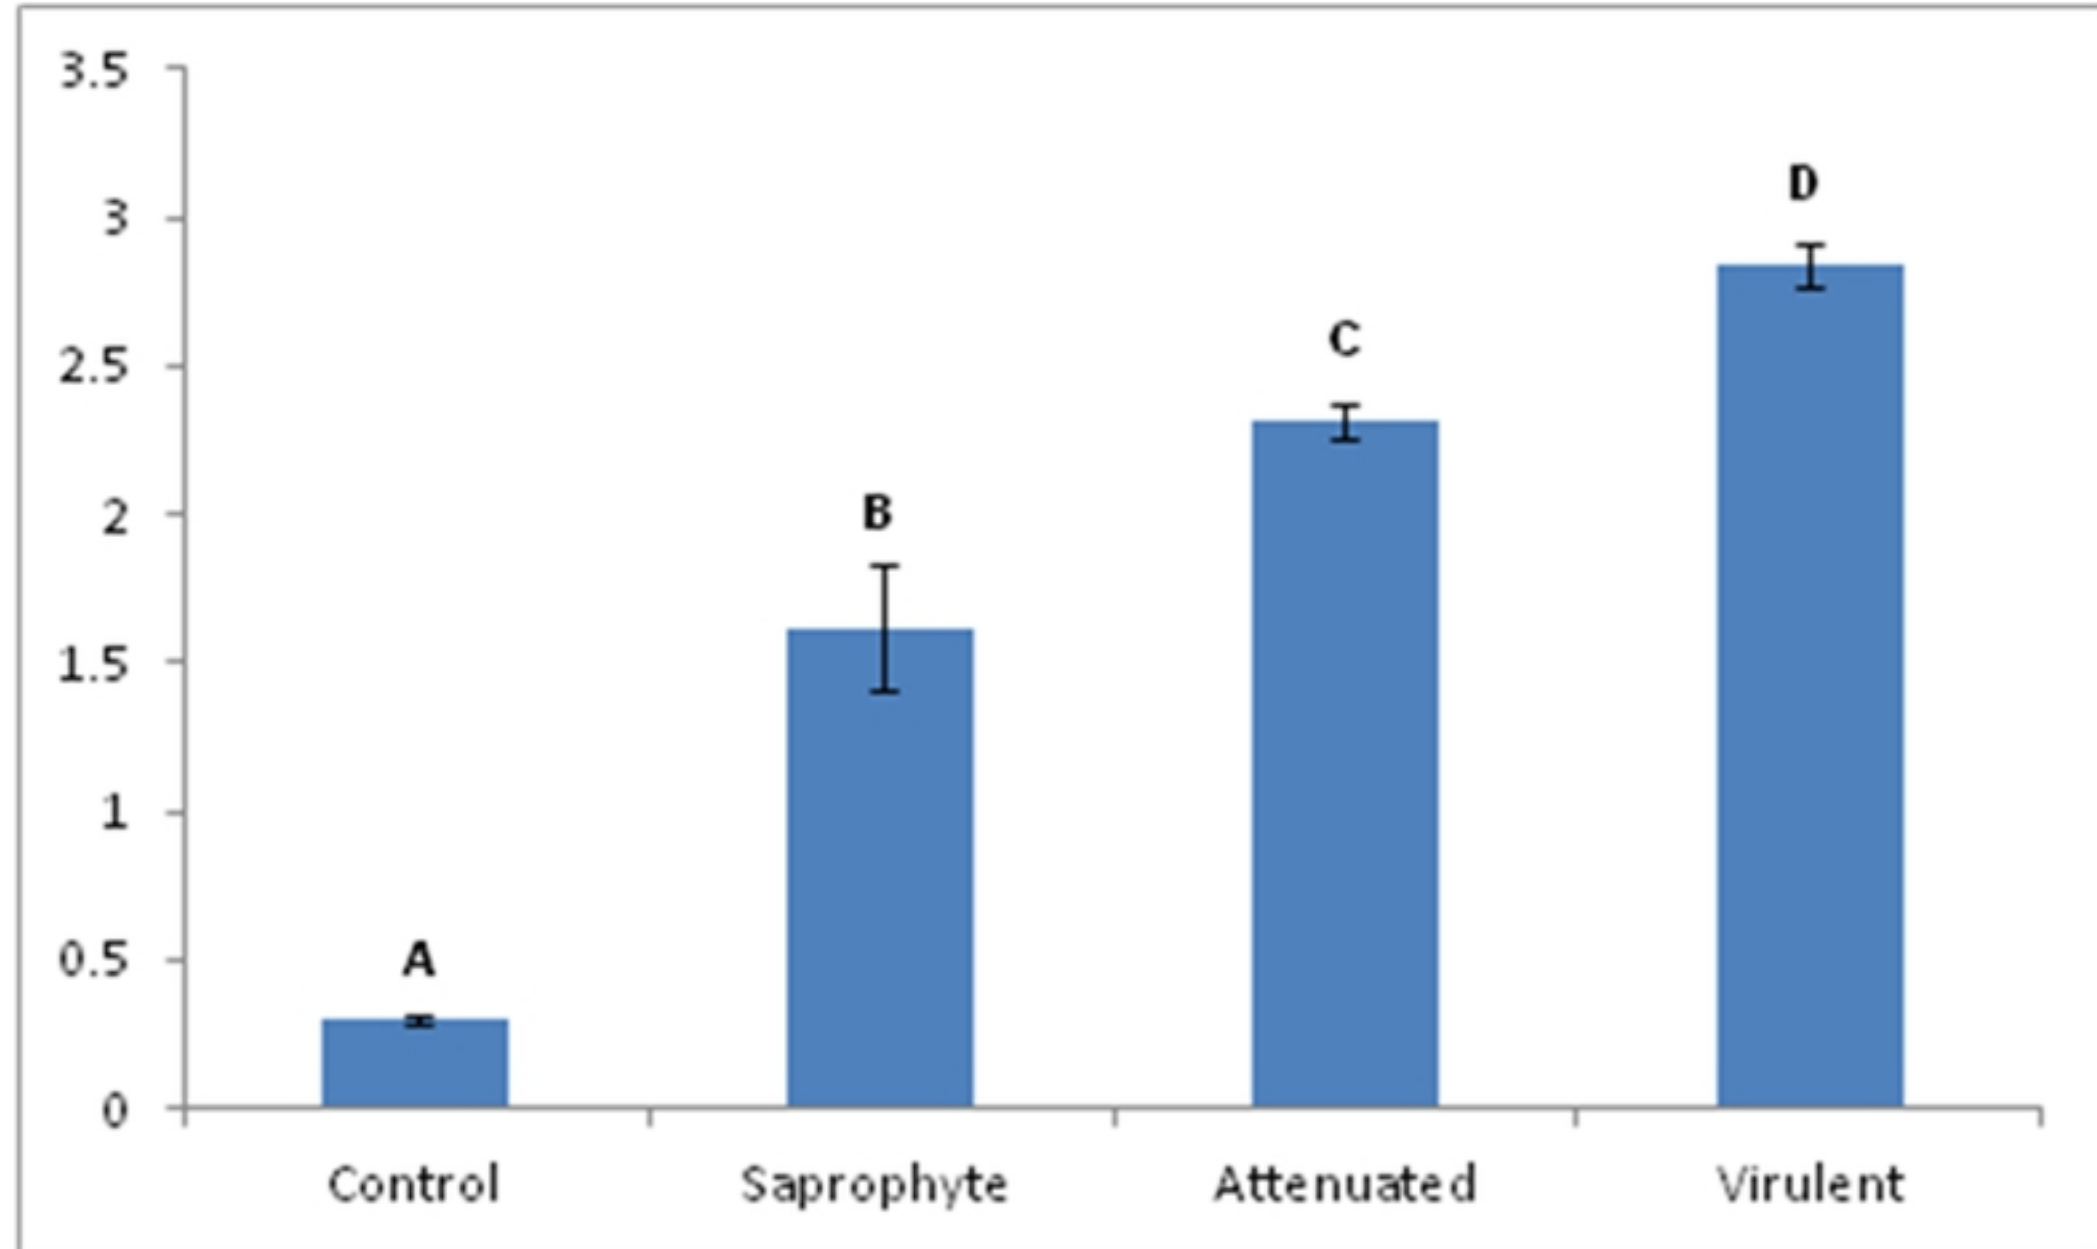

Fig6A

Relative Expression IL1B/ $\beta$ -Actin

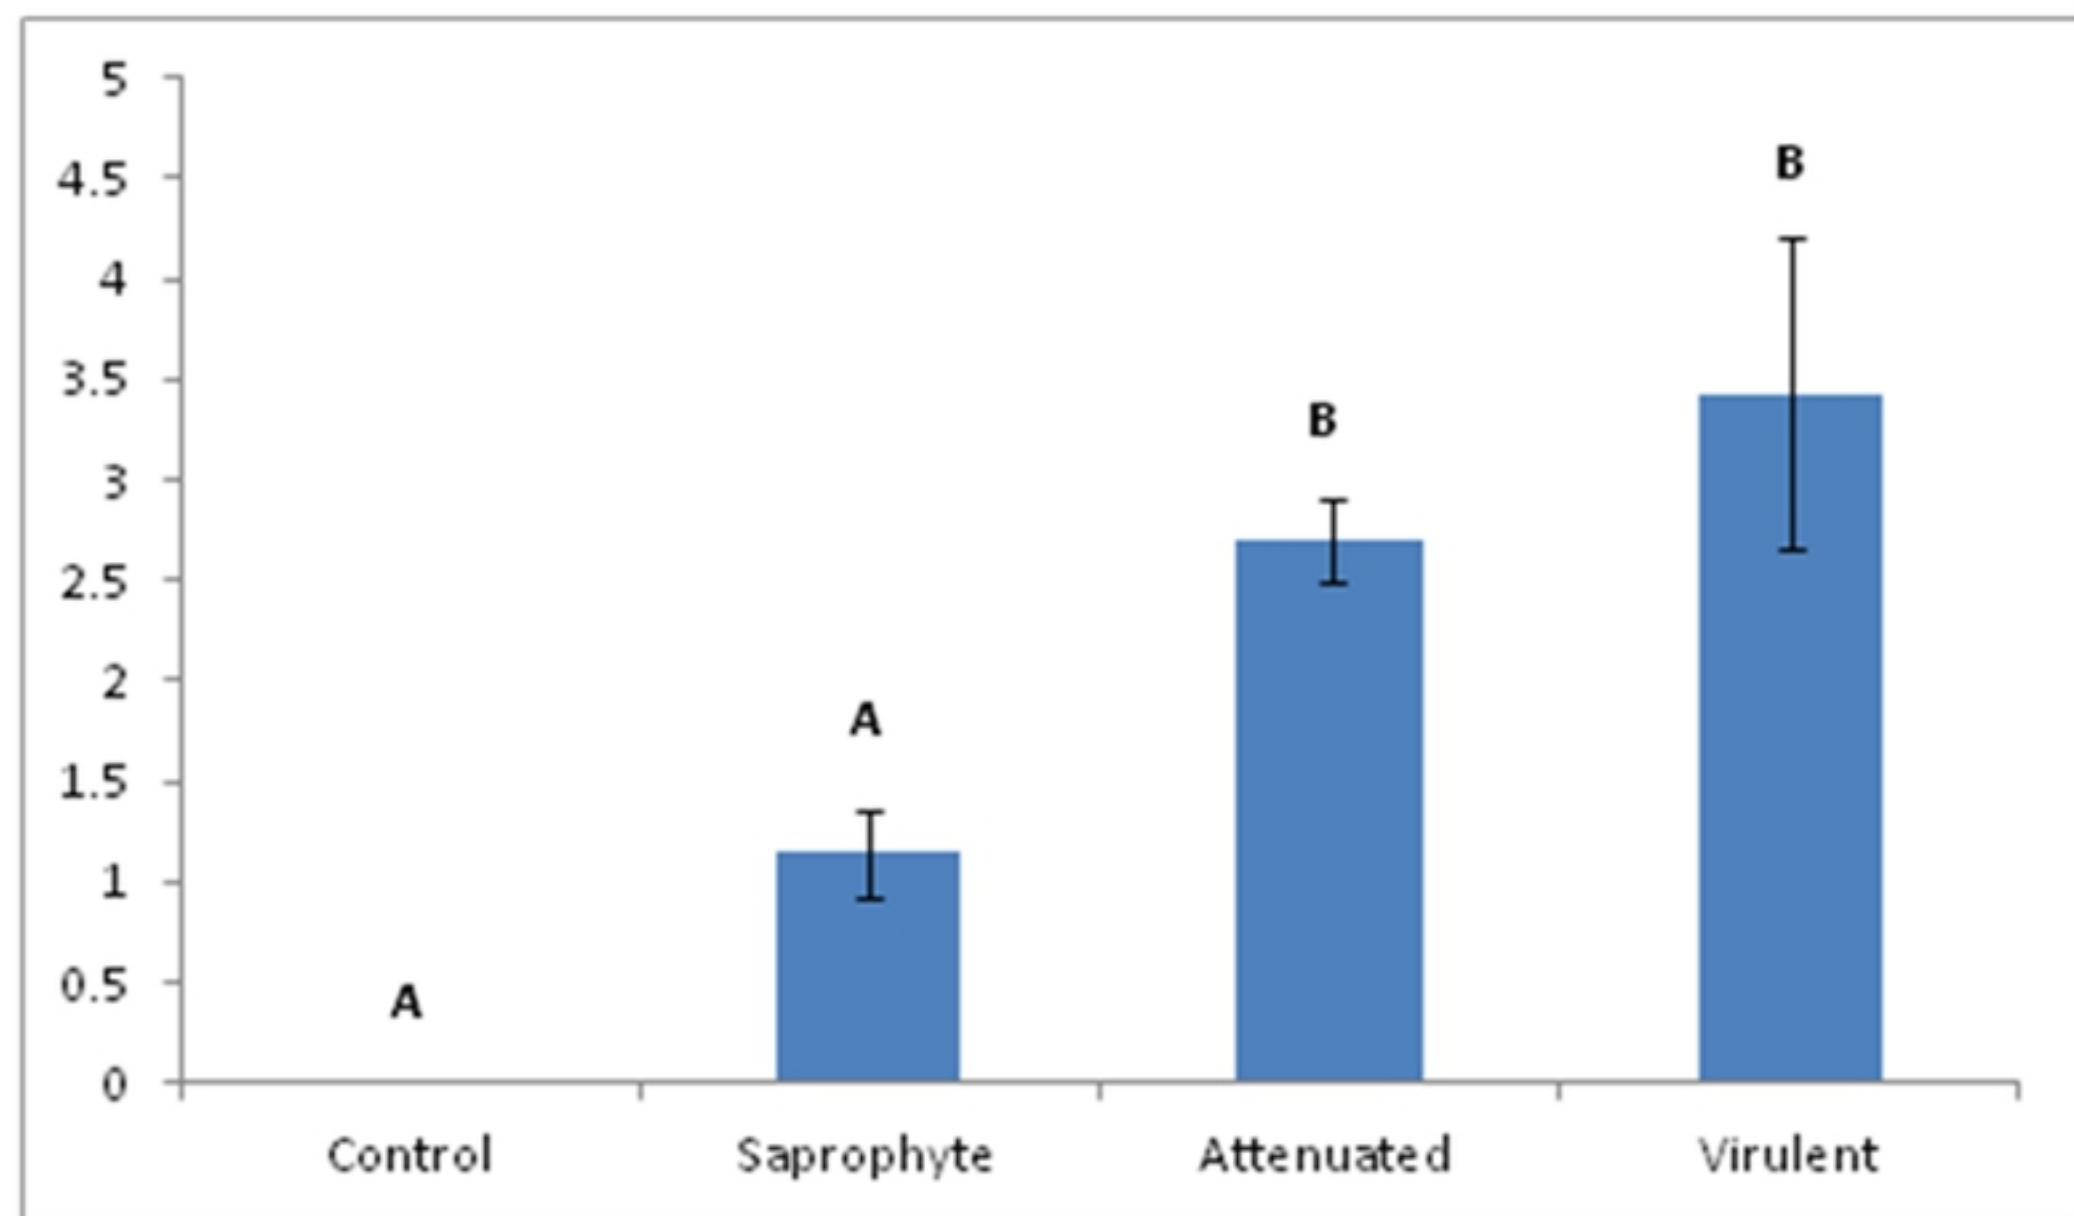

Fig6B



Relative Expression NOS2/ $\beta$ -Actin

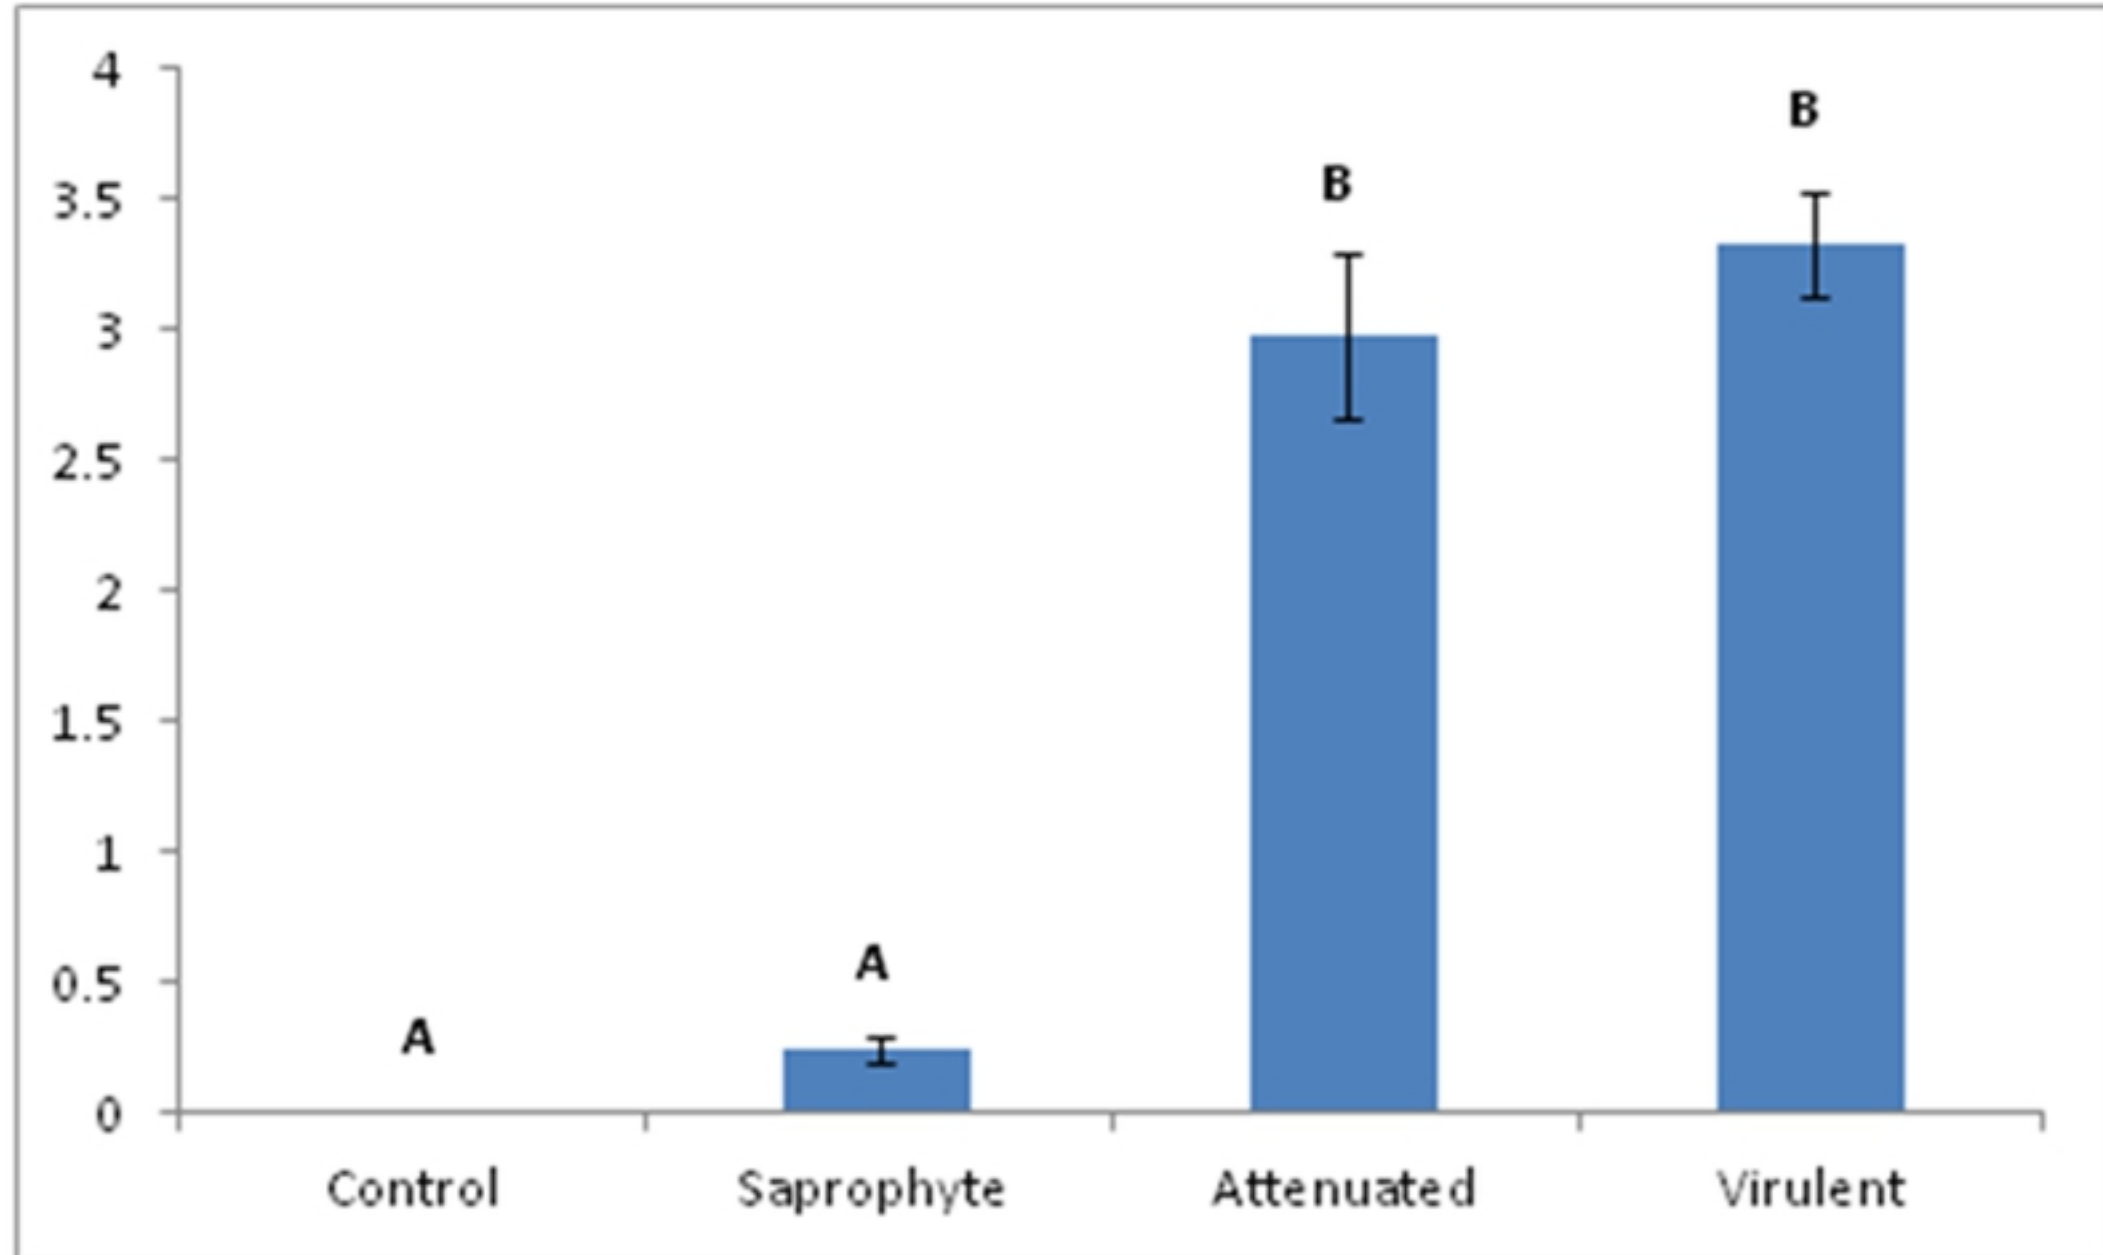

Fig6C
